# Supplementary material for: Demographic, lifestyle and comorbid risk factors for all-cause mortality in a Danish cohort of middle-aged adults with incident asthma
Source: PubMed Central journal article supplement — BMJ Open. 2021 Oct 4;11(10):e049243. doi: 10.1136/bmjopen-2021-049243 (PMC8491292; doi:10.1136/bmjopen-2021-049243), 2021-10-04
Supplement: bmjopen-2021-049243.draft_revisions.pdf [file bmjopen-2021-049243.draft_revisions.pdf]

# BMJ Open

BMJ Open is committed to open peer review. As part of this commitment we make the peer review history of every article we publish publicly available.

When an article is published we post the peer reviewers' comments and the authors' responses online. We also post the versions of the paper that were used during peer review. These are the versions that the peer review comments apply to.

The versions of the paper that follow are the versions that were submitted during the peer review process. They are not the versions of record or the final published versions. They should not be cited or distributed as the published version of this manuscript.

BMJ Open is an open access journal and the full, final, typeset and author-corrected version of record of the manuscript is available on our site with no access controls, subscription charges or pay-per-view fees (<http://bmjopen.bmj.com>).

If you have any questions on BMJ Open's open peer review process please email [info.bmjopen@bmj.com](mailto:info.bmjopen@bmj.com)

# BMJ Open

## Physical activity and comorbidities affect all-cause mortality in a cohort of middle-aged adults with incident asthma

|                               |                                                                                                                                                                                                                                                                  |
|-------------------------------|------------------------------------------------------------------------------------------------------------------------------------------------------------------------------------------------------------------------------------------------------------------|
| Journal:                      | <i>BMJ Open</i>                                                                                                                                                                                                                                                  |
| Manuscript ID                 | bmjopen-2021-049243                                                                                                                                                                                                                                              |
| Article Type:                 | Original research                                                                                                                                                                                                                                                |
| Date Submitted by the Author: | 04-Feb-2021                                                                                                                                                                                                                                                      |
| Complete List of Authors:     | Tupper, Oliver Djurhuus; Hvidovre Hospital, Department of Respiratory Medicine<br>Andersen, ZJ; University of Copenhagen Department of Public Health, Section of Environmental Health<br>Ulrik, Charlotte; Hvidovre Hospital, Department of Respiratory Medicine |
| Keywords:                     | Asthma < THORACIC MEDICINE, Epidemiology < THORACIC MEDICINE, Adult thoracic medicine < THORACIC MEDICINE                                                                                                                                                        |
|                               |                                                                                                                                                                                                                                                                  |

SCHOLARONE™  
Manuscripts

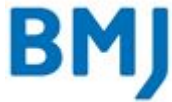

I, the Submitting Author has the right to grant and does grant on behalf of all authors of the Work (as defined in the below author licence), an exclusive licence and/or a non-exclusive licence for contributions from authors who are: i) UK Crown employees; ii) where BMJ has agreed a CC-BY licence shall apply, and/or iii) in accordance with the terms applicable for US Federal Government officers or employees acting as part of their official duties; on a worldwide, perpetual, irrevocable, royalty-free basis to BMJ Publishing Group Ltd ("BMJ") its licensees and where the relevant Journal is co-owned by BMJ to the co-owners of the Journal, to publish the Work in this journal and any other BMJ products and to exploit all rights, as set out in our [licence](#).

The Submitting Author accepts and understands that any supply made under these terms is made by BMJ to the Submitting Author unless you are acting as an employee on behalf of your employer or a postgraduate student of an affiliated institution which is paying any applicable article publishing charge ("APC") for Open Access articles. Where the Submitting Author wishes to make the Work available on an Open Access basis (and intends to pay the relevant APC), the terms of reuse of such Open Access shall be governed by a Creative Commons licence – details of these licences and which [Creative Commons](#) licence will apply to this Work are set out in our licence referred to above.

Other than as permitted in any relevant BMJ Author's Self Archiving Policies, I confirm this Work has not been accepted for publication elsewhere, is not being considered for publication elsewhere and does not duplicate material already published. I confirm all authors consent to publication of this Work and authorise the granting of this licence.

1

2 **Physical activity and comorbidities affect all-cause mortality in**3 **a cohort of middle-aged adults with incident asthma**4 Oliver Djurhuus Tupper<sup>1</sup>, Zorana Jovanovic Andersen<sup>2</sup>, and Charlotte5 Suppli Ulrik<sup>1,3</sup>6 <sup>1</sup> Department of Respiratory Medicine, Copenhagen University Hospital Hvidovre,

7 Denmark

8 <sup>2</sup> Section of Environmental Health, Department of Public health, University of

9 Copenhagen, Denmark

10 <sup>3</sup> Institute of Clinical Medicine, University of Copenhagen, Copenhagen, Denmark11 **Corresponding Author**

12 Oliver Djurhuus Tupper MD

13 Respiratory Research Unit

14 Department of Respiratory Medicine

15 Hvidovre Hospital

16 Kettegård Alle 30

17 DK-2650 Hvidovre

18 E-mail [olivertupper@gmail.com](mailto:olivertupper@gmail.com)

19

20 Word count abstract: 248

21 Word count main text: 2486

22

23

24

25

26

1  
2  
3 27  
45 28  
6  
78 29 **Abstract**  
910 30 Objectives:  
11  
12

13 31 We aimed to identify factors associated with all-cause mortality in adults with  
14  
15 32 incident asthma.

17 33 Setting:  
18  
19

20 34 Cross-sectional cohort study, in the metropolitan areas of Copenhagen and Aarhus,  
21  
22 35 Denmark.

24 36 Participants:  
25  
26

27 37 Adults aged 50–64 years enrolled in the Danish Diet, Cancer, and Health cohort were  
28  
29 38 followed from baseline (1993–1997) in the National Patients Registry for first-time  
30  
31 39 admissions for asthma and vital status. We defined incident asthma as at least one first-  
32  
33 40 time hospital admission with asthma as the primary registered diagnosis occurring  
34  
35 41 between baseline and end of follow-up (2013), in participants without previously known  
36  
37 42 asthma. Among the cohort comprising 57 053 individuals, we identified 785 adults (aged  
38  
39 43 50–64) with incident asthma, of whom 76 died during follow-up.

44 44 Primary and secondary outcome measures:  
45  
46

47 45 Baseline reported socioeconomic and lifestyle traits, and comorbidities associated with  
48  
49 46 all-cause mortality.

51 47 Results:  
52  
53

54 48 Self-reported leisure-time physical activity was associated with a substantial reduction  
55  
56 49 in risk with an HR of 0.53 (95 % CI 0.33–0.85). Being male, single, and having a diagnosis  
57  
58 50 of hypertension or diabetes were associated with an increased risk of all-cause mortality  
59  
60

1  
2  
3 51 with an HR of 1.83 (95 % CI 1.14–2.38), 2.16 (95 % CI 2.06–4.40), 2.47 (95 % CI 1.54–  
4  
5  
6 52 3.95) and of 2.42 (95 % CI 0.96–6.11), respectively.

7  
8 53 Conclusions:

9  
10 54 This long-term study of adults with hospital contacts for incident asthma revealed  
11  
12  
13 55 that self-reported leisure-time physical activity is associated with an approximately  
14  
15 56 50% reduction in all-cause mortality. While both hypertension and diabetes were  
16  
17 57 associated with a higher risk of mortality.

18  
19  
20 58

21  
22 59 **Strengths and limitations of this study:**

- 23  
24  
25 60 • The present study is one of very few reporting on how physical activity and  
26  
27 61 comorbidities are associated with all-cause mortality in adults with asthma.  
28  
29 62 • Seven hundred eighty-five persons with incident asthma were follow-up for  
30  
31 63 20 years, with no loss to follow-up.  
32  
33  
34 64 • The diagnosis of asthma is based on register information and not an objective  
35  
36 65 assessment.  
37  
38  
39 66 • There are only very few events among those with previous myocardial  
40  
41 67 infarction and stroke.

42  
43  
44 68

45  
46 69 **Keywords:** Asthma, middle-aged adults, population cohort, comorbidities, long-term

47  
48 70 **Short Title:** Physical activity and asthma mortality

49  
50  
51 71 **Introduction**

52  
53  
54 72 With over 300 million persons worldwide suffering from asthma and a multitude of  
55  
56  
57 73 deaths each year, asthma is a disease that continually requires attention.<sup>1,2</sup> Asthma  
58  
59 74 remains a disease that carries increased mortality compared with general populations.<sup>3,4</sup>

1  
2  
3 75 Asthma specific mortality has, overall, been on a steady decline since the 1950s.<sup>5-7</sup>  
4  
5  
6 76 However, a study based on the WHO Mortality Database found that mortality trends  
7  
8 77 have plateaued, with no significant change in mortality between 2006 and 2012.<sup>8</sup>  
9  
10 78 Furthermore, a British report from 2014 reported that over 67% of deaths related to  
11  
12 79 asthma were potentially preventable.<sup>9</sup>  
13  
14  
15 80 Asthma specific mortality alone does not provide the whole picture when evaluating the  
16  
17 81 risks of the disease for individual patients. A study evaluating deaths with asthma as a  
18  
19 82 contributing factor, in addition to asthma-specific causes, found that asthma as a  
20  
21 83 contributing factor was associated with more than twice as many deaths compared with  
22  
23 84 asthma-specific deaths alone.<sup>10</sup> Additionally, studies suggest that patients with asthma  
24  
25 85 are more prone to acquire other chronic conditions than the background population.<sup>11-</sup>  
26  
27  
28 86 <sup>13</sup> As the impact of factors as multimorbidity on all-cause mortality is an area with a  
29  
30 87 paucity of data, a need for studies in these areas exists.<sup>14</sup> The association between  
31  
32  
33 88 physical activity and long-term mortality has been well established in the general  
34  
35 89 population and patients with COPD.<sup>15,16</sup> However, this has not been examined  
36  
37  
38 90 extensively in asthma.<sup>17</sup> The impact of physical activity on asthma specific factors, such  
39  
40  
41 91 as disease control, lung function and exacerbations has been well researched.<sup>17</sup>  
42  
43  
44 92 Based on the currently available knowledge, it remains of utmost to further explore  
45  
46  
47 93 factors associated with asthma-related mortality, including not least all-cause mortality.  
48  
49  
50 94 The present study aimed to examine factors associated with long-term all-cause  
51  
52 95 mortality in adults with incident asthma from a large Danish cohort of adults.  
53  
54  
55 96

## 97 **Methods**

98 Characteristics of the Diet, Cancer and Health (DCH) cohort have been published  
99 previously, with a full description of the cohort.<sup>18,19</sup> A total of 160,725 individuals  
100 (72,729 women) were invited to participate in the DCH Cohort, between 1993 and 1997.  
101 All individuals resided in either Copenhagen or Aarhus, which are the two largest cities  
102 in Denmark. To be invited participants had to be 50—64 years of age and have no record  
103 of cancer at the time of inclusion. A total of 57,053 individuals (52.4% women, n=29,875)  
104 were enrolled in the study after accepting the invitation. The Central Danish Ethics  
105 Committee approved the main study of the DCH-cohort. The regional Danish Ethics  
106 Committee approved this sub-study (H-17025043) and the Danish Data Protection  
107 Agency (2014-41-3468). All participants provided written informed consent. Baseline  
108 factors were determined based on a comprehensive questionnaire completed by the  
109 participants. The questionnaire consisted of questions on general health and diet;  
110 demographic factors, including education and occupation; questions on lifestyle,  
111 including tobacco exposure; and pre-existing diseases, including asthma, COPD, diabetes,  
112 and cardiovascular disease.

113

### 114 *Study cohort*

115 Participants in the DCH cohort were included in the present analyses as cases if they had  
116 the first-ever admission to a hospital, emergency department, or outpatient clinic with  
117 a primary diagnosis of asthma, which occurred between cohort baseline (1993-1997)  
118 and July 1<sup>st</sup>, 2013. Participants with a self-reported diagnosis of asthma or COPD at  
119 baseline were excluded. Participants in the DCH cohort were linked to the Danish  
120 National Patient Registry (DNPR), to extract hospital contacts from 1993-1997 and until



1  
2  
3 121 July 1<sup>st</sup>, 2013.<sup>20</sup> The link between the DCH and DNPR was done using the unique  
4  
5 122 identifier all Danish residents have. Every discharge diagnoses from all Danish hospitals  
6  
7  
8 123 since 1978 and from outpatient clinics since 1995 are gathered in the DNPR.<sup>21</sup> In addition  
9  
10 124 to hospital contacts, we gathered emergency room visits and visits to respiratory  
11  
12 125 outpatient clinics. Asthma was classified according to the International Classification of  
13  
14 126 Diseases (ICD) as ICD-10 codes DJ45–46 and ICD-8 codes 493.00–493.09. Cases were  
15  
16 127 followed from first-ever asthma admission and until the time of death, or emigration, or  
17  
18 128 July 1<sup>st</sup>, 2013, whichever came first.  
19  
20  
21  
22

23 129  
24  
25 130 Physical activity in leisure-time was determined based on a participant filled  
26  
27 131 questionnaire. An interviewer checked the questionnaire. Participants reported the  
28  
29 132 number of hours per week they did leisure time and transport-related (ie, to and from  
30  
31 133 work, shopping) physical activity. Leisure-time physical activity was reported separately  
32  
33 134 for summer and winter of the previous year and was allocated in the following  
34  
35 135 categories: cycling, “do-it-yourself” activities (ie, home improvements), gardening,  
36  
37 136 housework (cleaning, laundry), sports and walking. The two values for summer and  
38  
39 137 winter were averaged. The questions used have previously been validated in two studies  
40  
41 138 by Peters et al and Cust et al that found high correlations with movement sensing  
42  
43 139 measurement and accelerometer measurements, respectively.<sup>22,23</sup> Participants who are  
44  
45 140 reported as being physically active in leisure time spent at least half an hour a week on  
46  
47 141 at one at least one of the six categories.  
48  
49  
50  
51  
52  
53

54 142

55  
56  
57 143 Statistical Analyses  
58  
59  
60

1  
2  
3 144 Associations between baseline factors and all-cause mortality were examined using the  
4  
5 145 Cox proportional hazards model with age as the underlying time scale. We examined the  
6  
7  
8 146 following baseline factors, identified at recruitment between 1993 and 1999: age, sex,  
9  
10 147 BMI, length of education, employment and civil status, tobacco history, occupational  
11  
12 148 exposure, leisure-time physical activity, fruit consumption, and co-morbidities. Baseline  
13  
14 149 factors were assessed in a two-step process: Step one, in a univariate model, with age  
15  
16 150 as the underlying time scale. Step two was in a multivariate model that included only  
17  
18 151 variables that were associated with all-cause mortality, defined by backwards  
19  
20 152 elimination. The proportional hazards assumption was evaluated by testing for a non-  
21  
22 153 zero slope in a generalised linear regression of the scaled Schoenfeld residuals on  
23  
24 154 functions of time. Results from the univariate and multivariate model are presented as  
25  
26 155 hazard ratios (HRs) with 95% confidence intervals (CIs). Stata, version 11.2, was used to  
27  
28 156 perform statistical analyses.  
29  
30  
31  
32  
33  
34  
35  
36

157

### 158 *Patient and Public Involvement*

159 Patients and the public were not involved in the design of the study.

160

## 161 **Results**

162 We identified 785 adults with an incident diagnosis of asthma, and by that fulfilling the  
163 criteria for inclusion in the present analyses. No individuals were lost to follow-up, and  
164 therefore complete data were available for all 785 individuals. All characteristics  
165 included in the following analyses were obtained at baseline.

1  
2  
3 166 Between baseline and July 1<sup>st</sup>, 2013, 76 of the identified adults with incident asthma  
4  
5 167 died. The majority of cases with incident asthma were women 63% (n=495). Only 45%  
6  
7 168 (n=351) were never smokers at baseline. Interestingly, a substantial proportion of  
8  
9 169 ever-smokers were ex-smokers (60%, n=260) and not current smokers (40%, n=174).  
10  
11 170 The amount of tobacco exposure was much higher among those who died compared  
12  
13 171 to those with incident asthma still alive at the end of follow-up. On average, persons  
14  
15 172 that died smoked 3.8 grams of tobacco per day, corresponding to 72% more than  
16  
17 173 those who were alive at the end of follow-up. Those that died had a daily intake of fruit  
18  
19 174 that was 16 g (or 8.3 %) less compared with those that were still alive. Further  
20  
21 175 characteristics are shown in Table 1.  
22  
23  
24  
25  
26

27 176  
28  
29 177 Of the baseline characteristics included in the analyses, the following were found to be  
30  
31 178 associated with all-cause mortality and were therefore included in the final model: (1)  
32  
33 179 sex, (2) smoking status, (3) physical activity in leisure time, (5) employment status, (6)  
34  
35 180 marital status, (7) diabetes and (8) hypertension. On the other hand, age and a  
36  
37 181 previous diagnosis of myocardial infarction or stroke lacked power for precise  
38  
39 182 estimates for all-cause mortality in univariate analyses and were therefore not  
40  
41 183 included in the final model.  
42  
43  
44  
45

46 184 Male sex was associated with a higher risk for all-cause mortality (HR 1.83, 95% CI  
47  
48 185 1.14-2.93).  
49  
50

51 186 Persons who reported being single had a higher mortality risk (HR of 2.16 95% CI 2.06-  
52  
53 187 4.40) compared with persons who reported being married.  
54  
55

56 188 Having a diagnosis of hypertension was associated with a substantially increased risk of  
57  
58 189 all-cause mortality (HR 2.47, 95% CI 1.54–3.95). Self-reported previous myocardial  
59  
60

1  
2  
3 190 infarction and a current diagnosis of diabetes had imprecise estimates associated with  
4  
5 191 all-cause mortality, although, notably, robust associations were detected. For  
6  
7  
8 192 myocardial infarction, we found an HR of 2.87 (95% CI 1.04-7.89) in the univariate  
9  
10 193 model and diabetes an HR of 2.42 (95% CI 0.96-6.11) in the multivariate model. There  
11  
12  
13 194 was not found an association between previous stroke and all-cause mortality.  
14  
15 195 The self-reported leisure-time physical activity showed a substantial reduction in all-  
16  
17 196 cause mortality (HR 0.53, 95% CI 0.33–0.85).  
18  
19 197 Mean daily fruit intake was not found to be associated with death (table 2).  
20  
21  
22  
23  
24

## 25 199 **Discussion**

26  
27  
28 200 In this Danish cohort of 785 adults with incident asthma followed for 20 years, we found  
29  
30 201 that physical activity was associated with a lower risk of all-cause mortality. In contrast,  
31  
32 202 being unmarried or having hypertension were associated with increased all-cause  
33  
34 203 mortality.  
35  
36  
37

### 38 204 *Physical Activity*

39  
40 205  
41  
42 206 To the best of our knowledge, this is the first cohort study that has reported the  
43  
44 207 association between self-reported physical activity and all-cause mortality, specifically  
45  
46 208 in individuals with asthma. Physical activity has previously been shown to have a  
47  
48 209 positive effect on multiple aspects of asthma.<sup>17</sup> Particularly relevant are two studies by  
49  
50 210 Garcia-Aymerich et al<sup>24</sup> and Fisher et al<sup>25</sup> that found a protective effect of self-reported  
51  
52 211 physical activity on hospitalisation with asthma exacerbations. While the same effect  
53  
54 212 could not be found on readmissions for exacerbations in the study by Fisher et al<sup>25</sup>, it is  
55  
56 213 an important support of our findings, as exacerbations are associated with morbidity  
57  
58  
59  
60

1  
2  
3 214 and mortality.<sup>26</sup> Physical activity also appears to have a positive effect on asthma  
4  
5 215 control.<sup>27</sup> However, BMI appears to be more critical, negating the effects of physical  
6  
7  
8 216 activity in some, but not all, models.<sup>17</sup> It appears though that if persons with asthma do  
9  
10  
11 217 a moderate level of physical activity compared with inactivity and strenuous physical  
12  
13 218 activity that asthma control is positively affected.<sup>28</sup> The positive effects on these other  
14  
15 219 asthma outcomes could support our finding of physical activities associated with a  
16  
17  
18 220 lower risk of mortality.

19  
20 221 The effects of physical activity are prudent to establish as we know that persons with  
21  
22 222 asthma generally are less physically active than the general population.<sup>29</sup> Further, we  
23  
24  
25 223 know from a Cochrane review from 2013 that physical activity is well-tolerated and  
26  
27  
28 224 safe for individuals with asthma.<sup>30</sup> The review found that physical activity may improve  
29  
30 225 cardiopulmonary function in individuals with asthma, without a negative impact on  
31  
32  
33 226 pulmonary function. Furthermore, the Cochrane review is based on shorter-term  
34  
35 227 studies, long-term findings from the Copenhagen City Heart study suggest that physical  
36  
37  
38 228 activity may diminish long-term lung function decline in individuals with asthma.<sup>31</sup> The  
39  
40 229 amount of physical activity required to be defined as physically active in our study is  
41  
42  
43 230 relatively low and, therefore, should be attainable by most. However, future studies  
44  
45 231 should explore whether there are additional benefits from moderate and high levels of  
46  
47  
48 232 activity. Additionally, is there an upper limit of activity where the risks of adverse  
49  
50 233 outcomes outweigh the benefits. Based on our findings, there is absolutely reason to  
51  
52  
53 234 motivate persons with asthma to do some form of physical activity in their leisure  
54  
55 235 time.

56  
57 236

58  
59 237 *Comorbidities*  
60

1  
2  
3 238 Hypertension had a strong association with death. Overall all included comorbid  
4  
5 239 conditions at baseline seemed to be associated with a higher risk of death. However,  
6  
7  
8 240 only hypertension had a robust estimate, probably since the remaining comorbidities  
9  
10 241 (diabetes, stroke and myocardial infarction) had a relatively low prevalence at baseline.  
11  
12  
13 242 There is limited research on how hypertension relates to mortality in person with  
14  
15 243 asthma.<sup>14</sup> We found one other study by Sumino et al<sup>32</sup> from 2014 that report the  
16  
17 244 association between hypertension and mortality. They found there was a lower OR for  
18  
19 245 mortality among individuals with hypertension for individuals over the age of 65 years.  
20  
21  
22 246 However, the study by Sumino et al<sup>32</sup> had a much shorter follow-up of three years  
23  
24  
25 247 compared to the 20 years of our study. Given that hypertension is a condition that gives  
26  
27 248 long-term complications, these complications are likely not caught across such a short  
28  
29 249 period.  
30  
31  
32 250 While the estimated hazard ratio for mortality among those with diabetes was  
33  
34 251 imprecise, due to lack of power, it is worth mentioning that there appeared to be a  
35  
36 252 strong association between diabetes and a higher risk of all-cause mortality. While,  
37  
38 253 again, the amount of other studies is exceedingly limited, there is other literature  
39  
40 254 supporting this finding. The study by Sumino et al<sup>32</sup> found that diabetes was associated  
41  
42 255 with a higher rate of mortality in persons over the age of 65. Another cohort study by  
43  
44 256 Koskela et al<sup>33</sup> showed that among 110 patients admitted due to an asthma  
45  
46 257 exacerbation, there was a higher risk of mortality for those with diabetes. While there  
47  
48 258 is a clear trend in our data towards higher all-cause mortality risk for individuals with  
49  
50 259 previous myocardial infarction, once again, the HR estimate was imprecise due to only  
51  
52 260 four events. Nevertheless, an excess risk of mortality due to cardiovascular disease is an  
53  
54  
55  
56  
57  
58  
59  
60

1  
2  
3 261 area that has substantial data supporting it in asthma cohorts, and this certainly  
4  
5 262 supports our finding.<sup>34,35</sup>  
6  
7  
8 263 The factors presented in this paper may seem obvious but needs to be verified in asthma  
9  
10 264 mainly, as many of these factors have not previously been explored in relation to adults  
11  
12  
13 265 with asthma. Not least in large cohorts, as in the present long-term follow-up study of a  
14  
15 266 large cohort of middle-aged men and women with asthma. The relevance of this is due  
16  
17 267 to the systemic inflammation present in persons with asthma, which potentially could  
18  
19  
20 268 affect and change which factors are essential to be aware of compared with general  
21  
22  
23 269 populations.<sup>36,37</sup>  
24

25 270

26 271

27 272 *Limitations*

28  
29  
30 273 The diagnosis of asthma in the included subjects was based on ICD-10 codes connected  
31  
32 274 to Hospital contacts, which is not as accurate as objectively verified asthma. However,  
33  
34  
35 275 this has previously been established by Jensen et al<sup>38</sup> to be a robust method of  
36  
37  
38 276 identifying persons with asthma. The positive predictive value was found to be 65%;  
39  
40 277 despite this, they discovered that associations found are still relevant. Selecting only  
41  
42  
43 278 persons with either a hospital or outpatient contact means we likely only have those  
44  
45  
46 279 with moderate and severe disease included in the cohort. Meaning the findings in this  
47  
48  
49 280 article cannot be universally applied.

50  
51  
52 281 The prevalence of asthma in this cohort is low (about 1%), substantially lower than the  
53  
54 282 current reported prevalence in Denmark of 10%, therefore, the generalizability is  
55  
56  
57 283 limited. The low prevalence is due to only including participants without a previous  
58  
59 284 diagnosis of asthma and only included individuals referred to secondary care.  
60

1  
2  
3 285 Our definition of physical activity was based on self-reported information, which carries  
4  
5 286 a certain degree of bias. Additionally, a potential limitation is that the degree of self-  
6  
7 287 reported physical activity for some was reported multiple years before the first contact  
8  
9 288 for incident asthma. We can, therefore, not be sure that the level of physical activity still  
10  
11 289 applies at follow-up. However, previous literature suggests that physical activity tracks  
12  
13 290 well over time, particularly in adulthood.<sup>39,40</sup>

14  
15 291 We did not have information on the specific cause of death and therefore were unable  
16  
17 292 to examine factors relating to asthma specific mortality.

18  
19 293 As the number of events in this cohort study was not substantial and therefore not  
20  
21 294 meeting the traditional, events per variable of 10 rule.<sup>41</sup> There is, therefore, a risk of  
22  
23 295 both type 1 and 2 errors. The results of this study can, therefore, not stand on their own,  
24  
25 296 yet it provides a valuable source for future studies. This is particularly evident for  
26  
27 297 diabetes, which shows a clear trend for higher risk of mortality, though it lacks the power  
28  
29 298 for a precise estimate.

30  
31 299

### 32 300 *Conclusions*

33 301 Our study has shown that for middle-aged individuals with hospital contact for incident  
34  
35 302 asthma, there appears to be increased mortality for persons with comorbidity, whereas  
36  
37 303 leisure-time physical activity was found to have a protective effect on mortality risk.

38  
39 304

### 40 305 **Abbreviations:**

41 306 BMI = Body Mass Index

42 307 DCH = Diet Cancer and Health Cohort

43 308 HR = Hazard Ratio

44 309 OR = Odds Ratio



310

311 **Declarations**312 **Ethics approval and consent to participate:** The study was approved by the ethical

313 committee for the Capital Region of Denmark (H-17025043), the regional data safety

314 committee for the capital region of Denmark (P-2019-712), and The Danish Data

315 Protection Agency (2014-41-3468). All participants signed an informed consent form.

316 **Funding:** This research did not receive any specific grant from funding agencies in  
317 the public, commercial, or not-for-profit sectors.318 **Competing interests:** ODT, ZJA and CSU have no perceived conflicts of interest in  
319 relation to this study.320 **Authors' contributions:** Conception and design—ODT, ZJA and CSU.; preparation of  
321 data and statistical analyses - ZJA.; statistical interpretation and drafted the  
322 manuscript—ODT; all authors critically reviewed and accepted the final version of the  
323 manuscript.324 **Availability of data and material:** The data are available upon reasonable request, but  
325 analysis may require approval from the regional data safety committee for the capital  
326 region of Denmark (Videnscenter for dataanmeldelser).327 **Acknowledgements:** Thanks to Anne Tjønneland and Kim Overvad for providing us  
328 with access to the data from the Diet, Cancer and Health cohort.

329

330 **References**

- 331 1. WHO. Global surveillance, prevention and control of chronic respiratory
- 
- 332 diseases: a comprehensive approach.
- 
- 333
- <http://www.who.int/gard/publications/GARD Book 2007.pdf?ua=1>
- 
- 334 2. Global strategy for asthma management and prevention. Global Initiative for
- 
- 335 Asthma (GINA). Published 2020. Accessed June 16, 2020.
- <https://ginasthma.org>

- 336 3. Huovinen E, Kaprio J, Vesterinen E, Koskenvuo M. Mortality of adults with  
337 asthma: A prospective cohort study. *Thorax*. 1997;52(1):49-54.  
338 doi:10.1136/thx.52.1.49
- 339 4. D'Amato G, Vitale C, Molino A, et al. Asthma-related deaths. *Multidiscip Respir*  
340 *Med*. 2016;11(1):1-5. doi:10.1186/s40248-016-0073-0
- 341 5. Speizer FE, Doll R, Heaf P. Observations on Recent Increase in Mortality from  
342 Asthma. *Br Med J*. 1968;1(5588):335-339. doi:10.1136/bmj.1.5588.335
- 343 6. Jackson RT, Beaglehole R, Rea HH, Sutherland DC. Mortality from asthma: A new  
344 epidemic in New Zealand. *Br Med J*. 1982;285(6344):771-774.  
345 doi:10.1136/bmj.285.6344.771
- 346 7. Sly RM. Mortality from asthma, 1979-1984. *J Allergy Clin Immunol*. 1988;82(5  
347 PART 1):705-717. doi:10.1016/0091-6749(88)90069-3
- 348 8. Ebmeier S, Thayabaran D, Braithwaite I, Bénamara C, Weatherall M, Beasley R.  
349 Trends in international asthma mortality: analysis of data from the WHO  
350 Mortality Database from 46 countries (1993–2012). *Lancet*.  
351 2017;390(10098):935-945. doi:10.1016/S0140-6736(17)31448-4
- 352 9. Levy ML. The national review of asthma deaths: What did we learn and what  
353 needs to change? *Breathe*. 2015;11(1):15-24. doi:10.1183/20734735.008914
- 354 10. McCoy L, Redelings M, Sorvillo F, Simon P. A multiple cause-of-death analysis of  
355 asthma mortality in the United States, 1990-2001. *J Asthma*. 2005;42(9):757-  
356 763. doi:10.1080/02770900500308189
- 357 11. Soriano JB, Visick GT, Muellerova H, Payvandi N, Hansell AL. Patterns of  
358 comorbidities in newly diagnosed COPD and asthma in primary care. *Chest*.  
359 2005;128(4):2099-2107. doi:10.1378/chest.128.4.2099
- 360 12. Gershon AS, Wang C, Guan J, To T. Burden of comorbidity in individuals with  
361 asthma. *Thorax*. 2010;65(7):612-618. doi:10.1136/thx.2009.131078
- 362 13. Adams RJ, Wilson DH, Taylor AW, et al. Coexistent chronic conditions and  
363 asthma quality of life: A population-based study. *Chest*. 2006;129(2):285-291.  
364 doi:10.1378/chest.129.2.285
- 365 14. Marques de Mello L, Cruz AA. A proposed scheme to cope with comorbidities in  
366 asthma. *Pulm Pharmacol Ther*. 2018;52:41-51. doi:10.1016/j.pupt.2018.08.005
- 367 15. Lear SA, Hu W, Rangarajan S, et al. The effect of physical activity on mortality  
368 and cardiovascular disease in 130 000 people from 17 high-income, middle-  
369 income, and low-income countries: the PURE study. *Lancet*.  
370 2017;390(10113):2643-2654. doi:10.1016/s0140-6736(17)31634-3
- 371 16. Waschki B, Kirsten A, Holz O, et al. Physical activity is the strongest predictor of  
372 all-cause mortality in patients with COPD: a prospective cohort study. *Chest*.  
373 2011;140(2):331-342. doi:10.1378/chest.10-2521
- 374 17. Cordova-Rivera L, Gibson PG, Gardiner PA, McDonald VM. A Systematic Review  
375 of Associations of Physical Activity and Sedentary Time with Asthma Outcomes. *J*  
376 *Allergy Clin Immunol Pr*. 2018;6(6):1968-1981 e2. doi:10.1016/j.jaip.2018.02.027
- 377 18. Tjønneland A, Olsen A, Boll K, et al. Study design, exposure variables, and  
378 socioeconomic determinants of participation in Diet, Cancer and Health: a  
379 population-based prospective cohort study of 57,053 men and women in  
380 Denmark. *Scand J Public Health*. 2007;35(4):432-441.  
381 doi:10.1080/14034940601047986
- 382 19. Bønnelykke K, Raaschou-Nielsen O, Tjønneland A, Ulrik CS, Bisgaard H, Andersen

- 1  
2  
3 383 ZJ. Postmenopausal hormone therapy and asthma-related hospital admission. *J*  
4 384 *Allergy Clin Immunol*. 2015;135(3):813-816.e5. doi:10.1016/j.jaci.2014.11.019  
5 385 20. Pedersen CB. The Danish Civil Registration System. *Scand J Public Health*.  
6 386 2011;39(7\_suppl):22-25. doi:10.1177/1403494810387965  
7 387 21. Schmidt M, Schmidt SAJ, Sandegaard JL, Ehrenstein V, Pedersen L, Sørensen HT.  
8 388 The Danish National Patient Registry: a review of content, data quality, and  
9 389 research potential. *Clin Epidemiol*. 2015;7:449. doi:10.2147/CLEP.S91125  
10 390 22. Cust AE, Smith BJ, Chau J, et al. Validity and repeatability of the EPIC physical  
11 391 activity questionnaire: A validation study using accelerometers as an objective  
12 392 measure. *Int J Behav Nutr Phys Act*. 2008;5(1):33. doi:10.1186/1479-5868-5-33  
13 393 23. Peters T, Brage S, Westgate K, et al. Validity of a short questionnaire to assess  
14 394 physical activity in 10 European countries. *Eur J Epidemiol*. 2012;27(1):15-25.  
15 395 doi:10.1007/s10654-011-9625-y  
16 396 24. Garcia-Aymerich J, Varraso R, Antó JM, Camargo CA. Prospective study of  
17 397 physical activity and risk of asthma exacerbations in older women. *Am J Respir*  
18 398 *Crit Care Med*. 2009;179(11):999-1003. doi:10.1164/rccm.200812-1929OC  
19 399 25. Fisher JE, Loft S, Ulrik CS, et al. Physical Activity, Air Pollution, and the Risk of  
20 400 Asthma and Chronic Obstructive Pulmonary Disease. *Am J Respir Crit Care Med*.  
21 401 2016;194(7):855-865. doi:10.1164/rccm.201510-2036OC  
22 402 26. Chipps BE, Zeiger RS, Borish L, et al. Key findings and clinical implications from  
23 403 the Epidemiology and Natural History of Asthma: Outcomes and Treatment  
24 404 Regimens (TENOR) study. *J Allergy Clin Immunol*. 2012;130(2):332-342.e10.  
25 405 doi:10.1016/j.jaci.2012.04.014  
26 406 27. Panagiotou M, Koulouris NG, Rovina N. Physical Activity: A Missing Link in  
27 407 Asthma Care. *J Clin Med*. 2020;9(3):706. doi:10.3390/jcm9030706  
28 408 28. Del Giacco SR, Firinu D, Bjermer L, Carlsen K-H. Exercise and asthma: an  
29 409 overview. *Eur Clin Respir J*. 2015;2(1):27984. doi:10.3402/ecrj.v2.27984  
30 410 29. van 't Hul AJ, Frouws S, van den Akker E, et al. Decreased physical activity in  
31 411 adults with bronchial asthma. *Respir Med*. 2016;114:72-77.  
32 412 doi:10.1016/j.rmed.2016.03.016  
33 413 30. Kv C, Mg C, Picot J, Mp B, Aj E, Bj S. Physical training for asthma ( Review )  
34 414 SUMMARY OF FINDINGS FOR THE MAIN COMPARISON. *Cochrane Libr*.  
35 415 2013;(9):1-73.  
36 416 doi:10.1002/14651858.CD001116.pub4.www.cochranelibrary.com  
37 417 31. Garcia-Aymerich J, Lange P, Benet M, Schnohr P, Antó JM. Regular physical  
38 418 activity modifies smoking-related lung function decline and reduces risk of  
39 419 chronic obstructive pulmonary disease: A population-based cohort study. *Am J*  
40 420 *Respir Crit Care Med*. 2007;175(5):458-463. doi:10.1164/rccm.200607-896OC  
41 421 32. Sumino K, O'Brian K, Bartle B, Au DH, Castro M, Lee TA. Coexisting chronic  
42 422 conditions associated with mortality and morbidity in adult patients with  
43 423 asthma. *J Asthma*. 2014;51(3):306-314. doi:10.3109/02770903.2013.879881  
44 424 33. Koskela HO, Salonen PH, Romppanen J, Niskanen L. A history of diabetes but not  
45 425 hyperglycaemia during exacerbation of obstructive lung disease has impact on  
46 426 long-term mortality: A prospective, observational cohort study. *BMJ Open*.  
47 427 2015;5(1):6794. doi:10.1136/bmjopen-2014-006794  
48 428 34. Xu M, Xu J, Yang X. Asthma and risk of cardiovascular disease or all-cause  
49 429 mortality: A meta-analysis. *Ann Saudi Med*. 2017;37(2):99-105.

- 1  
2  
3 430 doi:10.5144/0256-4947.2017.99  
4 431 35. Strand LB, Tsai MK, Wen CP, Chang S Sen, Brumpton BM. Is having asthma  
5 432 associated with an increased risk of dying from cardiovascular disease? A  
6 433 prospective cohort study of 446 346 Taiwanese adults. *BMJ Open*. 2018;8(5).  
7 434 doi:10.1136/bmjopen-2017-019992  
8 435 36. Denburg JA, Sehmi R, Saito H, Pil-Seob J, Inman MD, O'Byrne PM. Systemic  
9 436 aspects of allergic disease: Bone marrow responses. *J Allergy Clin Immunol*.  
10 437 2000;106(5):S242-S246. doi:10.1067/mai.2000.110156  
11 438 37. Bjermer L. Time for a paradigm shift in asthma treatment: From relieving  
12 439 bronchospasm to controlling systemic inflammation. *J Allergy Clin Immunol*.  
13 440 2007;120(6):1269-1275. doi:10.1016/j.jaci.2007.09.017  
14 441 38. Jensen AO, Nielsen GL, Ehrenstein V. Validity of asthma diagnoses in the Danish  
15 442 National Registry of Patients, including an assessment of impact of  
16 443 misclassification on risk estimates in an actual dataset. *Clin Epidemiol*.  
17 444 2010;2:67-72. <https://www.ncbi.nlm.nih.gov/pubmed/20865105>  
18 445 39. Telama R. Tracking of physical activity from childhood to adulthood: A review.  
19 446 *Obes Facts*. 2009;2(3):187-195. doi:10.1159/000222244  
20 447 40. Mertens E, Clarys P, Mullie P, et al. Stability of physical activity, fitness  
21 448 components and diet quality indices. *Eur J Clin Nutr*. 2017;71(4):519-524.  
22 449 doi:10.1038/ejcn.2016.172  
23 450 41. Vittinghoff E, McCulloch CE. Relaxing the rule of ten events per variable in  
24 451 logistic and cox regression. *Am J Epidemiol*. 2007;165(6):710-718.  
25 452 doi:10.1093/aje/kwk052  
26 453  
27 454  
28 455  
29 456  
30 457  
31 458  
32 459  
33 460  
34 461  
35 462  
36 463  
37 464  
38 465  
39 466  
40 467  
41 468  
42 469  
43 470

## 471 Tables

472  
473  
474  
475  
476  
477  
478  
479  
480  
481  
482  
483  
484  
485  
486  
487  
488  
489  
490  
491  
492  
493  
494  
495  
496  
497  
498  
499  
500  
501  
502  
503  
504  
505  
506  
507  
508  
509  
510  
511  
512  
513  
514  
515  
516  
517  
518  
519  
520  
521  
522  
523  
524  
525  
526  
527  
528  
529  
530  
531  
532  
533  
534  
535  
536  
537  
538  
539  
540  
541  
542  
543  
544  
545  
546  
547  
548  
549  
550  
551  
552  
553  
554  
555  
556  
557  
558  
559  
560

**Table 1 – Baseline characteristics of 785 adults enrolled in the Danish Diet, Cancer and Health Cohort with incident asthma between baseline (1993-1997) and follow-up (July 2013).**

473

|                                               | Asthma<br>(N = 785)   | Alive<br>(N= 709) | Dead<br>(N = 76) |
|-----------------------------------------------|-----------------------|-------------------|------------------|
| Age 50-55, n (%)                              | 50 (6.4)              | 44 (6.2)          | 6 (7.9)          |
| Age 55-60, n (%)                              | 155 (19.7)            | 136 (19.2)        | 19 (25.0)        |
| Age 60-65, n (%)                              | 580 (73.9)            | 529 (74.6)        | 51 (67.1)        |
| Men, n (%)                                    | 290 (37)              | 136 (19)          | 19 (25)          |
| Mean body mass index (kg/m <sup>2</sup> )     | 26.5 (12)             | 26.4 (4.2)        | 27.1 (4.6)       |
| Smoking history, n (%)                        | Never                 | 351 (45)          | 318 (45)         |
|                                               | Previous              | 260 (33)          | 241 (34)         |
|                                               | Current               | 174 (22)          | 150 (21)         |
| Mean smoking duration, years (SD)             | 25.9 (12)             | 25.3 (12)         | 31.1 (12)        |
| Mean smoking intensity, g/day (SD)            | 5.7 (9.1)             | 5.3 (9.0)         | 9.1 (10)         |
| Exposed to environmental tobacco smoke, n (%) | 449 (57)              | 403 (57)          | 46 (61)          |
| Physically active in leisure time, n (%)      | 432 (55)              | 404 (57)          | 28 (37)          |
| Mean fruit intake, g/day (SD)                 | 192 (145)             | 193 (146)         | 177 (129)        |
| Employed, n (%)                               | 612 (78)              | 559 (79)          | 53 (70)          |
| Marital status, n (%)                         | Single                | 45 (5.7)          | 35 (4.9)         |
|                                               | Married               | 558 (71)          | 507 (72)         |
|                                               | Divorced              | 136 (17)          | 125 (18)         |
|                                               | Widowed               | 46 (5.9)          | 42 (5.9)         |
| Years of Education<br>n (%)                   | < 8                   | 223 (28)          | 198 (28)         |
|                                               | 8 – 10                | 395 (50)          | 361 (51)         |
|                                               | ≥ 10                  | 167 (21)          | 150 (21)         |
| Comorbidity n (%)                             | Myocardial infarction | 13 (1.7)          | 9 (1.3)          |
|                                               | Stroke                | 4 (0.5)           | 3 (0.4)          |
|                                               | Diabetes              | 13 (1.7)          | 8 (1.1)          |
|                                               | Hypertension          | 155 (20)          | 126 (18)         |
|                                               | Hypercholesterolemia  | 46 (5.9)          | 45 (6.3)         |

SD = standard deviation

474

475

476

477

478

479  
480 **Table 2 - Determinants at baseline of survival in 785 adults with incident asthma during follow-up**  
481 **(2013) among participants in the Danish Diet, Cancer and Health Cohort.**

|                                     |                                                | Univariate<br>model<br>HR (95% CI) | Multivariate<br>model<br>HR (95% CI) |
|-------------------------------------|------------------------------------------------|------------------------------------|--------------------------------------|
| <b>Age</b>                          | 50-55                                          | 1.00                               | -                                    |
|                                     | 55-60                                          | 0.84 (0.33-2.14)                   |                                      |
|                                     | 60-65                                          | 0.76 (0.28-2.08)                   |                                      |
| <b>Sex</b>                          | Female                                         | 1.00                               | 1.00                                 |
|                                     | Male                                           | 1.76 (1.12-2.75)                   | 1.83 (1.14-2.93)                     |
| <b>Body Mass index</b>              | Underweight/Normal (<25<br>kg/m <sup>2</sup> ) | 1.00                               | -                                    |
|                                     | Overweight (25-30 kg/m <sup>2</sup> )          | 1.56 (0.93-2.63)                   | -                                    |
|                                     | Obese (≥ 30 kg/m <sup>2</sup> )                | 1.52 (0.79-2.91)                   | -                                    |
| <b>Smoking</b>                      | Never                                          | 1.00                               | 1.00                                 |
|                                     | Previous                                       | 0.67 (0.38-1.18)                   | 0.59 (0.33-1.05)                     |
|                                     | Current                                        | 1.64 (0.96-2.78)                   | 1.39 (0.81-2.38)                     |
| <b>Activity in Leisure<br/>Time</b> | Inactive                                       | 1.00                               | 1.00                                 |
|                                     | Active                                         | 0.47 (0.29-0.74)                   | 0.53 (0.33-0.85)                     |
| <b>Mean fruit intake</b>            | g/day                                          | 0.91 (0.76-1.07)                   | -                                    |
| <b>Employment</b>                   | Yes                                            | 1.00                               | 1.00                                 |
|                                     | No                                             | 1.17 (0.70-1.96)                   | 1.04 (0.87-1.25)                     |
| <b>Marital Status</b>               | Single                                         | 2.77 (1.40-5.48)                   | 2.16 (2.06-4.40)                     |
|                                     | Married                                        | 1.00                               | 1.00                                 |
|                                     | Divorced                                       | 0.79 (0.41-1.51)                   | 0.76 (0.40-1.47)                     |
|                                     | Widowed                                        | 0.83 (0.30-2.30)                   | 1.15 (0.40-3.27)                     |
| <b>Myocardial infarction</b>        | -                                              | 1.00                               | -                                    |
|                                     | +                                              | 2.87 (1.04-7.89)                   | -                                    |
| <b>Stroke</b>                       | -                                              | 1.00                               | -                                    |
|                                     | +                                              | 1.58 (0.22-<br>11.43)              | -                                    |
| <b>Diabetes</b>                     | -                                              | 1.00                               | 1.00                                 |
|                                     | +                                              | 3.58 (1.44-8.90)                   | 2.42 (0.96-6.11)                     |
| <b>Hypertension</b>                 | -                                              | 1.00                               | 1.00                                 |
|                                     | +                                              | 2.57 (1.61-4.09)                   | 2.47 (1.54-3.95)                     |

482 HR = Hazard Ratio. CI = Confidence interval.



STROBE Statement—Checklist of items that should be included in reports of *cohort studies*

|                              | Item No | Recommendation                                                                                                                                                                                                                                                                                                                                            |
|------------------------------|---------|-----------------------------------------------------------------------------------------------------------------------------------------------------------------------------------------------------------------------------------------------------------------------------------------------------------------------------------------------------------|
| <b>Title and abstract</b>    | 1       | (a) Indicate the study's design with a commonly used term in the title or the abstract – page 1<br>(b) Provide in the abstract an informative and balanced summary of what was done and what was found<br>- page 2                                                                                                                                        |
| <b>Introduction</b>          |         |                                                                                                                                                                                                                                                                                                                                                           |
| Background/rationale         | 2       | Explain the scientific background and rationale for the investigation being reported<br>-page 3-4                                                                                                                                                                                                                                                         |
| Objectives                   | 3       | State specific objectives, including any prespecified hypotheses<br>-page 4                                                                                                                                                                                                                                                                               |
| <b>Methods</b>               |         |                                                                                                                                                                                                                                                                                                                                                           |
| Study design                 | 4       | Present key elements of study design early in the paper<br>-page 4                                                                                                                                                                                                                                                                                        |
| Setting                      | 5       | Describe the setting, locations, and relevant dates, including periods of recruitment, exposure, follow-up, and data collection<br>-page 4-5                                                                                                                                                                                                              |
| Participants                 | 6       | (a) Give the eligibility criteria, and the sources and methods of selection of participants. Describe methods of follow-up<br>-page 4-5<br>(b) For matched studies, give matching criteria and number of exposed and unexposed<br>- N/A                                                                                                                   |
| Variables                    | 7       | Clearly define all outcomes, exposures, predictors, potential confounders, and effect modifiers. Give diagnostic criteria, if applicable<br>-page 4-6                                                                                                                                                                                                     |
| Data sources/<br>measurement | 8*      | For each variable of interest, give sources of data and details of methods of assessment (measurement). Describe comparability of assessment methods if there is more than one group<br>-page 4-6                                                                                                                                                         |
| Bias                         | 9       | Describe any efforts to address potential sources of bias                                                                                                                                                                                                                                                                                                 |
| Study size                   | 10      | Explain how the study size was arrived at<br>-page 4-5                                                                                                                                                                                                                                                                                                    |
| Quantitative variables       | 11      | Explain how quantitative variables were handled in the analyses. If applicable, describe which groupings were chosen and why<br>Page- 5-6                                                                                                                                                                                                                 |
| Statistical methods          | 12      | (a) Describe all statistical methods, including those used to control for confounding<br>-page 6<br>(b) Describe any methods used to examine subgroups and interactions<br>-N/A<br>(c) Explain how missing data were addressed<br>-N/A<br>(d) If applicable, explain how loss to follow-up was addressed<br>(e) Describe any sensitivity analyses<br>-N/A |

| <b>Results</b>           |     |                                                                                                                                                                                                                                                                                                                                                                                                                                       |
|--------------------------|-----|---------------------------------------------------------------------------------------------------------------------------------------------------------------------------------------------------------------------------------------------------------------------------------------------------------------------------------------------------------------------------------------------------------------------------------------|
| Participants             | 13* | (a) Report numbers of individuals at each stage of study—eg numbers potentially eligible, examined for eligibility, confirmed eligible, included in the study, completing follow-up, and analysed<br>Page -4 and 8<br>(b) Give reasons for non-participation at each stage<br>-due to space limitations non-participation for the DCH cohort is available in the referenced previous articles.<br>(c) Consider use of a flow diagram  |
| Descriptive data         | 14* | (a) Give characteristics of study participants (eg demographic, clinical, social) and information on exposures and potential confounders<br>-table 1<br>(b) Indicate number of participants with missing data for each variable of interest<br>-N/A<br>(c) Summarise follow-up time (eg, average and total amount)<br>-page 8                                                                                                         |
| Outcome data             | 15* | Report numbers of outcome events or summary measures over time                                                                                                                                                                                                                                                                                                                                                                        |
| Main results             | 16  | (a) Give unadjusted estimates and, if applicable, confounder-adjusted estimates and their precision (eg, 95% confidence interval). Make clear which confounders were adjusted for and why they were included<br>-table 2<br>(b) Report category boundaries when continuous variables were categorized<br>-tabel 2<br>(c) If relevant, consider translating estimates of relative risk into absolute risk for a meaningful time period |
| Other analyses           | 17  | Report other analyses done—eg analyses of subgroups and interactions, and sensitivity analyses<br>-N/A                                                                                                                                                                                                                                                                                                                                |
| <b>Discussion</b>        |     |                                                                                                                                                                                                                                                                                                                                                                                                                                       |
| Key results              | 18  | Summarise key results with reference to study objectives<br>-page 8                                                                                                                                                                                                                                                                                                                                                                   |
| Limitations              | 19  | Discuss limitations of the study, taking into account sources of potential bias or imprecision. Discuss both direction and magnitude of any potential bias<br>Page 11-12                                                                                                                                                                                                                                                              |
| Interpretation           | 20  | Give a cautious overall interpretation of results considering objectives, limitations, multiplicity of analyses, results from similar studies, and other relevant evidence<br>-page 8-11                                                                                                                                                                                                                                              |
| Generalisability         | 21  | Discuss the generalisability (external validity) of the study results<br>-page 11                                                                                                                                                                                                                                                                                                                                                     |
| <b>Other information</b> |     |                                                                                                                                                                                                                                                                                                                                                                                                                                       |
| Funding                  | 22  | Give the source of funding and the role of the funders for the present study and, if applicable, for the original study on which the present article is based<br>-page 12                                                                                                                                                                                                                                                             |

\*Give information separately for exposed and unexposed groups.



1 **Note:** An Explanation and Elaboration article discusses each checklist item and gives methodological background and  
2 published examples of transparent reporting. The STROBE checklist is best used in conjunction with this article (freely  
3 available on the Web sites of PLoS Medicine at <http://www.plosmedicine.org/>, Annals of Internal Medicine at  
4 <http://www.annals.org/>, and Epidemiology at <http://www.epidem.com/>). Information on the STROBE Initiative is  
5 available at <http://www.strobe-statement.org>.  
6  
7  
8  
9  
10  
11  
12  
13  
14  
15  
16  
17  
18  
19  
20  
21  
22  
23  
24  
25  
26  
27  
28  
29  
30  
31  
32  
33  
34  
35  
36  
37  
38  
39  
40  
41  
42  
43  
44  
45  
46  
47  
48  
49  
50  
51  
52  
53  
54  
55  
56  
57  
58  
59  
60

For peer review only

# BMJ Open

## Physical activity and comorbidities as risk factors for all-cause mortality in a cohort of middle-aged adults with incident asthma?

|                                 |                                                                                                                                                                                                                                                                  |
|---------------------------------|------------------------------------------------------------------------------------------------------------------------------------------------------------------------------------------------------------------------------------------------------------------|
| Journal:                        | <i>BMJ Open</i>                                                                                                                                                                                                                                                  |
| Manuscript ID                   | bmjopen-2021-049243.R1                                                                                                                                                                                                                                           |
| Article Type:                   | Original research                                                                                                                                                                                                                                                |
| Date Submitted by the Author:   | 23-Jun-2021                                                                                                                                                                                                                                                      |
| Complete List of Authors:       | Tupper, Oliver Djurhuus; Hvidovre Hospital, Department of Respiratory Medicine<br>Andersen, ZJ; University of Copenhagen Department of Public Health, Section of Environmental Health<br>Ulrik, Charlotte; Hvidovre Hospital, Department of Respiratory Medicine |
| <b>Primary Subject Heading</b>: | Epidemiology                                                                                                                                                                                                                                                     |
| Secondary Subject Heading:      | Respiratory medicine                                                                                                                                                                                                                                             |
| Keywords:                       | Asthma < THORACIC MEDICINE, Epidemiology < THORACIC MEDICINE, Adult thoracic medicine < THORACIC MEDICINE                                                                                                                                                        |
|                                 |                                                                                                                                                                                                                                                                  |

SCHOLARONE™  
Manuscripts



I, the Submitting Author has the right to grant and does grant on behalf of all authors of the Work (as defined in the below author licence), an exclusive licence and/or a non-exclusive licence for contributions from authors who are: i) UK Crown employees; ii) where BMJ has agreed a CC-BY licence shall apply, and/or iii) in accordance with the terms applicable for US Federal Government officers or employees acting as part of their official duties; on a worldwide, perpetual, irrevocable, royalty-free basis to BMJ Publishing Group Ltd ("BMJ") its licensees and where the relevant Journal is co-owned by BMJ to the co-owners of the Journal, to publish the Work in this journal and any other BMJ products and to exploit all rights, as set out in our [licence](#).

The Submitting Author accepts and understands that any supply made under these terms is made by BMJ to the Submitting Author unless you are acting as an employee on behalf of your employer or a postgraduate student of an affiliated institution which is paying any applicable article publishing charge ("APC") for Open Access articles. Where the Submitting Author wishes to make the Work available on an Open Access basis (and intends to pay the relevant APC), the terms of reuse of such Open Access shall be governed by a Creative Commons licence – details of these licences and which [Creative Commons](#) licence will apply to this Work are set out in our licence referred to above.

Other than as permitted in any relevant BMJ Author's Self Archiving Policies, I confirm this Work has not been accepted for publication elsewhere, is not being considered for publication elsewhere and does not duplicate material already published. I confirm all authors consent to publication of this Work and authorise the granting of this licence.

1  
2  
3 **Physical activity and comorbidities as risk factors for all-cause**  
4  
5  
6 **mortality in a cohort of middle-aged adults with incident**  
7  
8 **asthma?**  
9  
10

11  
12  
13 Oliver Djurhuus Tupper<sup>1</sup>, Zorana Jovanovic Andersen<sup>2</sup>, and Charlotte

14  
15  
16 Suppli Ulrik<sup>1,3</sup>  
17

18  
19 <sup>1</sup> Department of Respiratory Medicine, Copenhagen University Hospital Hvidovre,  
20  
21 Denmark  
22

23  
24 <sup>2</sup> Section of Environmental Health, Department of Public health, University of  
25  
26 Copenhagen, Denmark  
27

28  
29 <sup>3</sup> Institute of Clinical Medicine, University of Copenhagen, Copenhagen, Denmark  
30

31 **Corresponding Author**

32 Oliver Djurhuus Tupper MD  
33  
34 Respiratory Research Unit  
35  
36 Department of Respiratory Medicine  
37  
38 Hvidovre Hospital  
39  
40 Kettegård Alle 30  
41  
42 DK-2650 Hvidovre  
43  
44 E-mail [olivertupper@gmail.com](mailto:olivertupper@gmail.com)  
45  
46  
47  
48  
49  
50  
51  
52  
53  
54  
55  
56  
57  
58  
59  
60

Word count abstract: 250  
Word count main text: 2598

## Abstract

### Objectives:

We aimed to identify factors associated with all-cause mortality in adults with incident asthma.

### Design and setting:

Cross-sectional cohort study, in the metropolitan areas of Copenhagen and Aarhus, Denmark.

### Participants:

Adults aged 50–64 years enrolled in the Danish Diet, Cancer, and Health cohort were followed from baseline (1993–1997) in the National Patients Registry for first-time admissions for asthma and vital status. We defined incident asthma as at least one first-time hospital admission with asthma as the primary registered diagnosis between baseline and end of follow-up (2013) in participants without previously known asthma. Among the cohort comprising 57 053 individuals, we identified 785 adults (aged 50–64) with incident asthma, of whom 76 died during follow-up.

### Primary and secondary outcome measures:

Baseline reported socioeconomic and lifestyle traits, and comorbidities associated with all-cause mortality.

### Results:

Self-reported leisure-time physical activity was associated with a substantial reduction in risk with an HR of 0.53 (95 % CI 0.33–0.85). Being male, single, and having a diagnosis of hypertension or diabetes were associated with an increased risk of all-cause mortality

1  
2  
3 with an HR of 1.83 (95 % CI 1.14–2.38), 2.16 (95 % CI 2.06–4.40), 2.47 (95 % CI 1.54–  
4  
5 3.95) and of 2.42 (95 % CI 0.96–6.11), respectively.  
6  
7

### 8 Conclusions: 9

10 This long-term study of adults with hospital contacts for incident asthma revealed  
11 that self-reported leisure-time physical activity is associated with an approximately  
12  
13 50% reduction in all-cause mortality. In contrast, both hypertension and diabetes  
14  
15 were associated with a higher risk of mortality.  
16  
17  
18  
19  
20  
21

### 22 **Strengths and limitations of this study:** 23

- 24 • The present study is one of very few reporting on how physical activity and  
25 comorbidities are associated with all-cause mortality in adults with asthma.  
26  
27
- 28 • Seven hundred eighty-five persons with incident asthma were followed-up  
29 for 20 years, with no loss to follow-up.  
30  
31
- 32 • The diagnosis of asthma is based on register information and not an objective  
33 assessment.  
34  
35
- 36 • There are only very few events among those with previous myocardial  
37 infarction and stroke.  
38  
39  
40  
41  
42  
43  
44  
45

46 **Keywords:** Asthma, middle-aged adults, population cohort, comorbidities, long-term  
47

48 **Short Title:** Physical activity and asthma mortality  
49  
50

## 51 **Introduction** 52

53  
54 With over 300 million persons worldwide suffering from asthma and many deaths each  
55 year, asthma is a disease that continually requires attention.[1,2] Asthma remains a  
56  
57 disease that carries increased mortality compared with general populations.[3,4]  
58  
59  
60

1  
2  
3 Asthma-specific mortality has, overall, been on a steady decline since the 1950s.[5–7]  
4  
5  
6 However, a study based on the WHO Mortality Database found that mortality trends  
7  
8 have plateaued, with no significant change in mortality between 2006 and 2012.[8]  
9  
10  
11 Furthermore, a British report from 2014 reported that over 67% of deaths related to  
12  
13 asthma were potentially preventable.[9]

14  
15 Asthma-specific mortality alone does not provide the whole picture when evaluating the  
16  
17 risks of the disease for individual patients. A study assessing deaths with asthma as a  
18  
19 contributing factor, in addition to asthma-specific causes, found that asthma as a  
20  
21 contributing factor was associated with more than twice as many deaths compared with  
22  
23 asthma-specific deaths alone.[10] Studies suggest that patients with asthma are more  
24  
25 prone to acquire other chronic conditions than the background population.[11–13] As  
26  
27 the impact of factors as multimorbidity on all-cause mortality is an area with a paucity  
28  
29 of data, a need for studies in these areas exists.[14] The association between physical  
30  
31 activity and long-term mortality has been well established in the general population and  
32  
33 patients with COPD.[15,16] However, this has not been examined extensively in  
34  
35 asthma.[17] The impact of physical activity on asthma-specific factors, such as disease  
36  
37 control, lung function, and exacerbations has been well researched.[17]

38  
39  
40 Based on the currently available knowledge, it remains of utmost to further explore  
41  
42 factors associated with asthma-related mortality, including not least all-cause mortality.  
43  
44  
45 The present study aimed to examine factors associated with long-term all-cause  
46  
47 mortality in adults with incident asthma from a large Danish cohort of adults.  
48  
49  
50  
51  
52  
53  
54  
55  
56  
57  
58  
59  
60

## Methods

Characteristics of the Diet, Cancer, and Health (DCH) cohort have been published previously, with a full description of the cohort.[18,19] A total of 160,725 individuals (72,729 women) were invited to participate in the DCH Cohort between 1993 and 1997. All individuals resided in either Copenhagen or Aarhus, which are the two largest cities in Denmark. To be invited, participants had to be 50–64 years of age and have no record of cancer at the time of inclusion. A total of 57,053 individuals (52.4% women, n=29,875) were enrolled in the study after accepting the invitation. The Central Danish Ethics Committee approved the main study of the DCH-cohort. The regional Danish Ethics Committee approved this sub-study (H-17025043) and the Danish Data Protection Agency (2014-41-3468). All participants provided written informed consent. Baseline factors were determined based on a comprehensive questionnaire completed by the participants. The questionnaire consisted of questions on general health and diet; demographic factors, including education and occupation; questions on lifestyle, including tobacco exposure; and pre-existing diseases, including asthma, COPD, diabetes, and cardiovascular disease.

### *Study cohort*

Participants in the DCH cohort were defined as having incident asthma and included in the present analyses as cases if they had the first-ever admission to a hospital, emergency department, or outpatient clinic with a primary diagnosis of asthma, which occurred between cohort baseline (1993-1997) and July 1<sup>st</sup>, 2013. Asthma was classified according to the International Classification of Diseases (ICD) as ICD-10 codes DJ45–46 and ICD-8 codes 493.00–493.09. Participants with a self-reported diagnosis of asthma



1  
2  
3 or COPD at baseline were excluded. Participants in the DCH cohort were linked to the  
4  
5 Danish National Patient Registry (DNPR) to extract hospital contacts from 1993-1997  
6  
7 until July 1<sup>st</sup>, 2013.[20] The link between the DCH and DNPR was done using the unique  
8  
9 identifier all Danish residents have. Every discharge diagnosis from all Danish hospitals  
10  
11 since 1978 and from outpatient clinics since 1995 are gathered in the DNPR.[21] In  
12  
13 addition to hospital contacts, we gathered emergency room visits and visits to  
14  
15 respiratory outpatient clinics. Cases were followed from first-ever asthma admission  
16  
17 until the time of death, emigration, or July 1<sup>st</sup>, 2013, whichever came first.  
18  
19  
20  
21  
22  
23  
24

25 Physical activity in leisure time was determined based on a participant completed  
26  
27 questionnaire. An interviewer checked the questionnaire. Participants reported the  
28  
29 number of hours per week they did leisure time and transport-related (i.e., to and from  
30  
31 work, shopping) physical activity. Leisure-time physical activity was reported separately  
32  
33 for summer and winter of the previous year. It was allocated in the following categories:  
34  
35 cycling, "do-it-yourself" activities (i.e., home improvements), gardening, housework  
36  
37 (cleaning, laundry), sports, and walking. The two values for summer and winter were  
38  
39 averaged. The questions used have previously been validated in two studies by Peters  
40  
41 et al and Cust et al that found high correlations with movement sensing measurement  
42  
43 and accelerometer measurements, respectively.[22,23] Participants reported as being  
44  
45 physically active in leisure time, spent at least half an hour a week on at least one of the  
46  
47 six categories.  
48  
49  
50  
51  
52  
53  
54  
55  
56

## 57 Statistical Analyses

58  
59  
60

1  
2  
3 Associations between baseline factors and all-cause mortality were examined using the  
4  
5 Cox proportional hazards model with age as the underlying time scale. We examined the  
6  
7 following baseline factors identified at recruitment between 1993 and 1999: age, sex,  
8  
9 BMI, length of education, employment and civil status, tobacco history, occupational  
10  
11 exposure, leisure-time physical activity, fruit consumption, and comorbidities. Baseline  
12  
13 factors were assessed in a two-step process: Step one, in a univariate model, with age  
14  
15 as the underlying time scale. Step two was in a multivariate model that included only  
16  
17 variables associated with all-cause mortality, defined by backward elimination. The  
18  
19 proportional hazards assumption was evaluated by testing for a non-zero slope in a  
20  
21 generalised linear regression of the scaled Schoenfeld residuals on functions of time.  
22  
23 The univariate and multivariate model results are presented as hazard ratios (HRs) with  
24  
25 95% confidence intervals (CIs). Stata, version 11.2, was used to perform statistical  
26  
27 analyses.  
28  
29  
30  
31  
32  
33  
34  
35  
36  
37  
38

### *Patient and Public Involvement*

39 Patients and the public were not involved in the design of the study.  
40  
41  
42  
43  
44

## **Results**

45  
46  
47 We identified 785 adults with an incident diagnosis of asthma and fulfilled the criteria  
48  
49 for inclusion in the present analyses. No individuals were lost to follow-up, and  
50  
51 therefore complete data were available for all 785 individuals. All characteristics  
52  
53 included in the following analyses were obtained at baseline.  
54  
55  
56  
57  
58  
59  
60

1  
2  
3 Between baseline and July 1<sup>st</sup>, 2013, 76 of the identified adults with incident asthma  
4 died. The majority of cases with incident asthma were women 63% (n=495). Only 45%  
5  
6 (n=351) were never smokers at baseline. Interestingly, a substantial proportion of  
7  
8 ever-smokers were ex-smokers (60%, n=260) and not current smokers (40%, n=174).  
9  
10  
11 The amount of tobacco exposure was much higher among those who died than those  
12  
13 with incident asthma still alive at the end of follow-up. On average, persons who died  
14  
15 smoked 3.8 grams of tobacco per day, corresponding to 72% more than those alive at  
16  
17 the end of follow-up. Those who died had a daily intake of fruit that was 16 g (or 8.3 %)  
18  
19 less than those still alive. Further characteristics are shown in Table 1.  
20  
21  
22  
23  
24  
25  
26  
27

28 Of the baseline characteristics included in the analyses, the following were found to be  
29  
30 associated with all-cause mortality and were therefore included in the final model: (1)  
31  
32 sex, (2) smoking status, (3) physical activity in leisure time, (5) employment status, (6)  
33  
34 marital status, (7) diabetes and (8) hypertension. On the other hand, age and a  
35  
36 previous diagnosis of myocardial infarction or stroke lacked power for precise  
37  
38 estimates for all-cause mortality in univariate analyses and were therefore not  
39  
40 included in the final model.  
41  
42  
43  
44

45 Male sex was associated with a higher risk for all-cause mortality (HR 1.83, 95% CI  
46  
47 1.14-2.93).  
48

49 Persons who reported being single had a higher mortality risk (HR of 2.16 95% CI 2.06-  
50  
51 4.40) compared with persons who reported being married.  
52

53 A diagnosis of hypertension was associated with a substantially increased risk of all-  
54  
55 cause mortality (HR 2.47, 95% CI 1.54–3.95). Self-reported previous myocardial  
56  
57 infarction and a current diagnosis of diabetes had imprecise estimates associated with  
58  
59  
60

1  
2  
3 all-cause mortality, although, notably, robust associations were detected. We found an  
4  
5 HR of 2.87 (95% CI 1.04-7.89) in the univariate model for myocardial infarction. An HR  
6  
7 of 2.42 (95% CI 0.96-6.11) for diabetes was found in the multivariate model. There was  
8  
9 not found an association between previous stroke and all-cause mortality.  
10  
11

12  
13 The self-reported leisure-time physical activity showed a substantial reduction in all-  
14  
15 cause mortality (HR 0.53, 95% CI 0.33–0.85).  
16

17  
18 Mean daily fruit intake was not found to be associated with death (table 2).  
19  
20

## 21 22 **Discussion**

23  
24  
25 In this Danish cohort of 785 adults with incident asthma followed for 20 years, we found  
26  
27 that physical activity was associated with a lower risk of all-cause mortality. In contrast,  
28  
29 being unmarried or having hypertension were associated with increased all-cause  
30  
31 mortality.  
32  
33

### 34 35 *Physical Activity*

36  
37  
38 To the best of our knowledge, this is the first cohort study that has reported the  
39  
40 association between self-reported physical activity and all-cause mortality, specifically  
41  
42 in individuals with asthma. Physical activity has previously been shown to have a  
43  
44 positive effect on multiple aspects of asthma.[17] Particularly relevant are two studies  
45  
46 by Garcia-Aymerich et al[24] and Fisher et al[25] that found a protective effect of self-  
47  
48 reported physical activity on hospitalisation with asthma exacerbations. While the  
49  
50 same effect could not be found on readmissions for exacerbations in the study by  
51  
52 Fisher et al[25], their findings are essential support of our findings, as exacerbations  
53  
54 are associated with morbidity and mortality.[26] Physical activity also appears to have  
55  
56  
57  
58  
59  
60

1  
2  
3 a positive effect on asthma control.[27] However, BMI appears to be more critical,  
4  
5 negating the effects of physical activity in some, but not all, models.[17] It appears that  
6  
7 if persons with asthma do a moderate level of physical activity compared with  
8  
9 inactivity and strenuous physical activity, asthma control is positively affected.[28] The  
10  
11 positive effects on these other asthma outcomes could support our finding that  
12  
13 physical activity is associated with lower mortality risk.  
14  
15

16  
17 The effects of physical activity are prudent to establish as we know that persons with  
18  
19 asthma generally are less physically active than the general population.[29] Further,  
20  
21 we know from a Cochrane review from 2013 that physical activity is well-tolerated and  
22  
23 safe for individuals with asthma.[30] The review found that physical activity may  
24  
25 improve cardiopulmonary function in individuals with asthma without a negative  
26  
27 impact on pulmonary function. Furthermore, the Cochrane review is based on shorter-  
28  
29 term studies. Long-term findings from the Copenhagen City Heart study suggest that  
30  
31 physical activity may diminish long-term lung function decline in individuals with  
32  
33 asthma.[31] The amount of physical activity required to be defined as physically active  
34  
35 in our study is relatively low and, therefore, should be attainable by most. However,  
36  
37 future studies should explore whether there are additional benefits from moderate  
38  
39 and high levels of activity. Additionally, would a high or very high level of activity mean  
40  
41 the risks of adverse outcomes outweigh the benefits? A study by Russell et al.[32]  
42  
43 found that the benefits of physical activity on asthma symptoms were only present at  
44  
45 light levels of activity and not at intense activity levels. Based on our findings, there is  
46  
47 absolutely reason to motivate persons with asthma to do some form of physical  
48  
49 activity in their leisure time.  
50  
51  
52  
53  
54  
55  
56  
57  
58  
59  
60

### *Comorbidities*

Hypertension had a strong association with death. Overall all included comorbid conditions at baseline appeared to be associated with a higher risk of death. However, only hypertension had a robust estimate, probably since the remaining comorbidities (diabetes, stroke and myocardial infarction) had a relatively low prevalence at baseline.

There is limited research on how hypertension relates to mortality in a person with asthma.[14] We found one other study by Sumino et al[33] from 2014 that report the association between hypertension and mortality. They found a lower OR for mortality among individuals with hypertension for individuals over the age of 65 years. However, the study by Sumino et al[33] had a much shorter follow-up of three years compared with the 20 years of our study. Given that hypertension is a condition that gives long-term complications, these complications are likely not caught across such a short period.

While the estimated hazard ratio for mortality among those with diabetes was imprecise due to lack of power, it is worth mentioning that there appeared to be a strong association between diabetes and a higher risk of all-cause mortality. While the amount of other studies is exceedingly limited, there is other literature supporting this finding.

The study by Sumino et al[33] found that diabetes was associated with a higher mortality rate in persons over the age of 65. Another cohort study by Koskela et al[34] showed that among 110 patients admitted due to an asthma exacerbation, there was a higher risk of mortality for those with diabetes. While there is a clear trend in our data towards higher all-cause mortality risk for individuals with previous myocardial infarction, the HR estimate was imprecise once again due to only four events. Nevertheless, an excess risk of mortality due to cardiovascular disease is an area that has substantial data supporting it in asthma cohorts, and this certainly supports our finding.[35,36]

1  
2  
3 The factors presented in this paper may seem obvious but needs to be verified in asthma  
4  
5 mainly, as many of these factors have not previously been explored in relation to adults  
6  
7 with asthma. Not least in large cohorts, as in the present long-term follow-up study of a  
8  
9 large cohort of middle-aged men and women with asthma. The relevance of this is due  
10  
11 to the systemic inflammation present in persons with asthma, which potentially could  
12  
13 affect and change which factors are essential to be aware of compared with general  
14  
15 populations.[37,38]  
16  
17  
18  
19  
20  
21  
22  
23  
24

### 25 *Limitations*

26  
27 The diagnosis of asthma in the included subjects was based on ICD-10 codes connected  
28  
29 to hospital contacts, which is not as accurate as objectively verified asthma. However,  
30  
31 this has previously been established by Jensen et al[39] to be a robust method of  
32  
33 identifying persons with asthma. The positive predictive value was found to be 65%;  
34  
35 despite this, they discovered that associations found are still relevant. Selecting only  
36  
37 persons with either a hospital or outpatient contact means we may limit  
38  
39 generalisability, with the majority of persons included may have moderate or severe  
40  
41 disease. Nonetheless, a study from 2014 found that upwards of 25% of asthma  
42  
43 patients with mild to moderate disease experience poor asthma control and hospital  
44  
45 admissions.[40]  
46  
47  
48  
49  
50

51  
52 The prevalence of asthma in this cohort is low (about 1%), substantially lower than the  
53  
54 current reported prevalence in Denmark of 10%; therefore, the generalizability is  
55  
56 limited. The low prevalence is due to only including participants without a previous  
57  
58 diagnosis of asthma and only included individuals referred to secondary care.  
59  
60

1  
2  
3 Our definition of physical activity was based on self-reported information, which carries  
4 a certain degree of bias. Additionally, a potential limitation is that the degree of self-  
5 reported physical activity for some was reported multiple years before the first contact  
6 for incident asthma. We can, therefore, not be sure that the level of physical activity still  
7 applies at follow-up. However, previous literature suggests that physical activity tracks  
8 well over time, particularly in adulthood.[41,42]  
9

10 We did not have information on the specific cause of death and could not examine  
11 factors relating to asthma-specific mortality. Furthermore, we did not have data on  
12 asthma severity, medication, pulmonary function and previous exacerbation, which  
13 influences mortality risk.  
14

15 As the number of events in this cohort study was not substantial, there is a risk of both  
16 under and overestimating the importance of the identified risk factors. Therefore, the  
17 results of this study cannot stand on their own, yet it provides a valuable source for  
18 future studies. This is particularly evident for diabetes, which shows a clear trend for a  
19 higher risk of mortality, though it lacks the power for a precise estimate.  
20  
21  
22  
23  
24  
25  
26  
27  
28  
29  
30  
31  
32  
33  
34  
35  
36  
37  
38  
39  
40  
41

## 42 *Conclusions*

43  
44 Our study has shown that for middle-aged individuals with hospital contact for incident  
45 asthma, there appears to be increased mortality for persons with comorbidity. In  
46 contrast, leisure-time physical activity was found to have a protective effect on mortality  
47 risk.  
48  
49  
50  
51  
52  
53  
54  
55  
56

## 57 **Abbreviations:**

58 BMI = Body Mass Index  
59  
60



1  
2  
3 DCH = Diet Cancer and Health Cohort

4  
5 HR = Hazard Ratio

6  
7 OR = Odds Ratio

8  
9  
10  
11 **Declarations**

12  
13 **Ethics approval and consent to participate:** The study was approved by the ethical  
14 committee for the Capital Region of Denmark (H-17025043), the regional data safety  
15 committee for the capital region of Denmark (P-2019-712), and The Danish Data  
16 Protection Agency (2014-41-3468). All participants signed an informed consent form.

17  
18  
19  
20  
21  
22  
23 **Funding:** This research did not receive any specific grant from funding agencies in  
24 the public, commercial, or not-for-profit sectors.

25  
26  
27  
28 **Competing interests:** ODT, ZJA and CSU have no perceived conflicts of interest in  
29 relation to this study.

30  
31  
32  
33 **Authors' contributions:** Conception and design—ODT, ZJA and CSU.; preparation of  
34 data and statistical analyses - ZJA.; statistical interpretation and drafted the  
35 manuscript—ODT; all authors critically reviewed and accepted the final version of the  
36 manuscript.

37  
38  
39  
40  
41  
42  
43 **Availability of data and material:** The data are available upon reasonable request, but  
44 analysis may require approval from the regional data safety committee for the capital  
45 region of Denmark (Videnscenter for dataanmeldelser).

46  
47  
48  
49  
50 **Acknowledgements:** Thanks to Anne Tjønneland and Kim Overvad for providing us  
51 with access to the data from the Diet, Cancer and Health cohort.

## References

- 1 WHO. Global surveillance, prevention and control of chronic respiratory diseases: a comprehensive approach. <http://www.who.int/gard/publications/GARD Book 2007.pdf?ua=1>
- 2 Global strategy for asthma management and prevention. Glob. Initiat. Asthma. 2020. <https://ginasthma.org> (accessed 16 Jun 2020).
- 3 Huovinen E, Kaprio J, Vesterinen E, *et al.* Mortality of adults with asthma: A prospective cohort study. *Thorax* 1997;**52**:49–54. doi:10.1136/thx.52.1.49
- 4 D’Amato G, Vitale C, Molino A, *et al.* Asthma-related deaths. *Multidiscip Respir Med* 2016;**11**:1–5. doi:10.1186/s40248-016-0073-0
- 5 Speizer FE, Doll R, Heaf P. Observations on Recent Increase in Mortality from Asthma. *Br Med J* 1968;**1**:335–9. doi:10.1136/bmj.1.5588.335
- 6 Jackson RT, Beaglehole R, Rea HH, *et al.* Mortality from asthma: A new epidemic in New Zealand. *Br Med J* 1982;**285**:771–4. doi:10.1136/bmj.285.6344.771
- 7 Sly RM. Mortality from asthma, 1979–1984. *J Allergy Clin Immunol* 1988;**82**:705–17. doi:10.1016/0091-6749(88)90069-3
- 8 Ebmeier S, Thayabaran D, Braithwaite I, *et al.* Trends in international asthma mortality: analysis of data from the WHO Mortality Database from 46 countries (1993–2012). *Lancet* 2017;**390**:935–45. doi:10.1016/S0140-6736(17)31448-4
- 9 Levy ML. The national review of asthma deaths: What did we learn and what needs to change? *Breathe* 2015;**11**:15–24. doi:10.1183/20734735.008914
- 10 McCoy L, Redelings M, Sorvillo F, *et al.* A multiple cause-of-death analysis of asthma mortality in the United States, 1990–2001. *J Asthma* 2005;**42**:757–63. doi:10.1080/02770900500308189
- 11 Soriano JB, Visick GT, Muellerova H, *et al.* Patterns of comorbidities in newly diagnosed COPD and asthma in primary care. *Chest* 2005;**128**:2099–107. doi:10.1378/chest.128.4.2099
- 12 Gershon AS, Wang C, Guan J, *et al.* Burden of comorbidity in individuals with asthma. *Thorax* 2010;**65**:612–8. doi:10.1136/thx.2009.131078
- 13 Adams RJ, Wilson DH, Taylor AW, *et al.* Coexistent chronic conditions and asthma quality of life: A population-based study. *Chest* 2006;**129**:285–91. doi:10.1378/chest.129.2.285
- 14 Marques de Mello L, Cruz AA. A proposed scheme to cope with comorbidities in asthma. *Pulm Pharmacol Ther* 2018;**52**:41–51. doi:10.1016/j.pupt.2018.08.005
- 15 Lear SA, Hu W, Rangarajan S, *et al.* The effect of physical activity on mortality and cardiovascular disease in 130 000 people from 17 high-income, middle-income, and low-income countries: the PURE study. *Lancet* 2017;**390**:2643–54. doi:10.1016/s0140-6736(17)31634-3
- 16 Waschki B, Kirsten A, Holz O, *et al.* Physical activity is the strongest predictor of all-cause mortality in patients with COPD: a prospective cohort study. *Chest* 2011;**140**:331–42. doi:10.1378/chest.10-2521
- 17 Cordova-Rivera L, Gibson PG, Gardiner PA, *et al.* A Systematic Review of Associations of Physical Activity and Sedentary Time with Asthma Outcomes. *J Allergy Clin Immunol Pr* 2018;**6**:1968–1981 e2. doi:10.1016/j.jaip.2018.02.027
- 18 Tjønneland A, Olsen A, Boll K, *et al.* Study design, exposure variables, and socioeconomic determinants of participation in Diet, Cancer and Health: a population-based prospective cohort study of 57,053 men and women in

- Denmark. *Scand J Public Health* 2007;**35**:432–41. doi:10.1080/14034940601047986
- 19 Bønnelykke K, Raaschou-Nielsen O, Tjønneland A, *et al.* Postmenopausal hormone therapy and asthma-related hospital admission. *J Allergy Clin Immunol* 2015;**135**:813–816.e5. doi:10.1016/j.jaci.2014.11.019
- 20 Pedersen CB. The Danish Civil Registration System. *Scand J Public Health* 2011;**39**:22–5. doi:10.1177/1403494810387965
- 21 Schmidt M, Schmidt SAJ, Sandegaard JL, *et al.* The Danish National Patient Registry: a review of content, data quality, and research potential. *Clin Epidemiol* 2015;**7**:449. doi:10.2147/CLEP.S91125
- 22 Cust AE, Smith BJ, Chau J, *et al.* Validity and repeatability of the EPIC physical activity questionnaire: A validation study using accelerometers as an objective measure. *Int J Behav Nutr Phys Act* 2008;**5**:33. doi:10.1186/1479-5868-5-33
- 23 Peters T, Brage S, Westgate K, *et al.* Validity of a short questionnaire to assess physical activity in 10 European countries. *Eur J Epidemiol* 2012;**27**:15–25. doi:10.1007/s10654-011-9625-y
- 24 Garcia-Aymerich J, Varraso R, Antó JM, *et al.* Prospective study of physical activity and risk of asthma exacerbations in older women. *Am J Respir Crit Care Med* 2009;**179**:999–1003. doi:10.1164/rccm.200812-1929OC
- 25 Fisher JE, Loft S, Ulrik CS, *et al.* Physical Activity, Air Pollution, and the Risk of Asthma and Chronic Obstructive Pulmonary Disease. *Am J Respir Crit Care Med* 2016;**194**:855–65. doi:10.1164/rccm.201510-2036OC
- 26 Chippes BE, Zeiger RS, Borish L, *et al.* Key findings and clinical implications from the Epidemiology and Natural History of Asthma: Outcomes and Treatment Regimens (TENOR) study. *J Allergy Clin Immunol* 2012;**130**:332–342.e10. doi:10.1016/j.jaci.2012.04.014
- 27 Panagiotou M, Koulouris NG, Rovina N. Physical Activity: A Missing Link in Asthma Care. *J Clin Med* 2020;**9**:706. doi:10.3390/jcm9030706
- 28 Del Giacco SR, Firinu D, Bjermer L, *et al.* Exercise and asthma: an overview. *Eur Clin Respir J* 2015;**2**:27984. doi:10.3402/ecrj.v2.27984
- 29 van 't Hul AJ, Frouws S, van den Akker E, *et al.* Decreased physical activity in adults with bronchial asthma. *Respir Med* 2016;**114**:72–7. doi:10.1016/j.rmed.2016.03.016
- 30 Kv C, Mg C, Picot J, *et al.* Physical training for asthma ( Review ) SUMMARY OF FINDINGS FOR THE MAIN COMPARISON. *Cochrane Libr* 2013;:1–73. doi:10.1002/14651858.CD001116.pub4.www.cochranelibrary.com
- 31 Garcia-Aymerich J, Lange P, Benet M, *et al.* Regular physical activity modifies smoking-related lung function decline and reduces risk of chronic obstructive pulmonary disease: A population-based cohort study. *Am J Respir Crit Care Med* 2007;**175**:458–63. doi:10.1164/rccm.200607-896OC
- 32 Russell MA, Janson C, Real FG, *et al.* Physical activity and asthma: A longitudinal and multi-country study. *J Asthma* 2017;**54**:938–45. doi:10.1080/02770903.2017.1281293
- 33 Sumino K, O'Brian K, Bartle B, *et al.* Coexisting chronic conditions associated with mortality and morbidity in adult patients with asthma. *J Asthma* 2014;**51**:306–14. doi:10.3109/02770903.2013.879881
- 34 Koskela HO, Salonen PH, Romppanen J, *et al.* A history of diabetes but not

- 1  
2  
3 hyperglycaemia during exacerbation of obstructive lung disease has impact on  
4 long-term mortality: A prospective, observational cohort study. *BMJ Open*  
5 2015;**5**:6794. doi:10.1136/bmjopen-2014-006794  
6  
7 35 Xu M, Xu J, Yang X. Asthma and risk of cardiovascular disease or all-cause  
8 mortality: A meta-analysis. *Ann Saudi Med* 2017;**37**:99–105. doi:10.5144/0256-  
9 4947.2017.99  
10  
11 36 Strand LB, Tsai MK, Wen CP, *et al*. Is having asthma associated with an increased  
12 risk of dying from cardiovascular disease? A prospective cohort study of 446 346  
13 Taiwanese adults. *BMJ Open* 2018;**8**. doi:10.1136/bmjopen-2017-019992  
14  
15 37 Denburg JA, Sehmi R, Saito H, *et al*. Systemic aspects of allergic disease: Bone  
16 marrow responses. *J Allergy Clin Immunol* 2000;**106**:S242–6.  
17 doi:10.1067/mai.2000.110156  
18  
19 38 Bjermer L. Time for a paradigm shift in asthma treatment: From relieving  
20 bronchospasm to controlling systemic inflammation. *J Allergy Clin Immunol*  
21 2007;**120**:1269–75. doi:10.1016/j.jaci.2007.09.017  
22  
23 39 Jensen AO, Nielsen GL, Ehrenstein V. Validity of asthma diagnoses in the Danish  
24 National Registry of Patients, including an assessment of impact of  
25 misclassification on risk estimates in an actual dataset. *Clin Epidemiol*  
26 2010;**2**:67–72. <https://www.ncbi.nlm.nih.gov/pubmed/20865105>  
27  
28 40 von Bülow A, Kriegbaum M, Backer V, *et al*. The Prevalence of Severe Asthma  
29 and Low Asthma Control Among Danish Adults. *J Allergy Clin Immunol Pract*  
30 2014;**2**:759-767.e2. doi:10.1016/j.jaip.2014.05.005  
31  
32 41 Telama R. Tracking of physical activity from childhood to adulthood: A review.  
33 *Obes. Facts.* 2009;**2**:187–95. doi:10.1159/000222244  
34  
35 42 Mertens E, Clarys P, Mullie P, *et al*. Stability of physical activity, fitness  
36 components and diet quality indices. *Eur J Clin Nutr* 2017;**71**:519–24.  
37 doi:10.1038/ejcn.2016.172  
38  
39  
40  
41  
42  
43  
44  
45  
46  
47  
48  
49  
50  
51  
52  
53  
54  
55  
56  
57  
58  
59  
60

## Tables

**Table 1 – Baseline characteristics of 785 adults enrolled in the Danish Diet, Cancer and Health Cohort with incident asthma between baseline (1993-1997) and follow-up (July 2013).**

|                                               | Asthma<br>(N = 785)   | Alive<br>(N= 709) | Dead<br>(N = 76) |
|-----------------------------------------------|-----------------------|-------------------|------------------|
| Age 50-55, n (%)                              | 50 (6.4)              | 44 (6.2)          | 6 (7.9)          |
| Age 55-60, n (%)                              | 155 (19.7)            | 136 (19.2)        | 19 (25.0)        |
| Age 60-65, n (%)                              | 580 (73.9)            | 529 (74.6)        | 51 (67.1)        |
| Men, n (%)                                    | 290 (37)              | 136 (19)          | 19 (25)          |
| Mean body mass index (kg/m <sup>2</sup> )     | 26.5 (12)             | 26.4 (4.2)        | 27.1 (4.6)       |
| Smoking history, n (%)                        | Never                 | 351 (45)          | 318 (45)         |
|                                               | Previous              | 260 (33)          | 241 (34)         |
|                                               | Current               | 174 (22)          | 150 (21)         |
| Mean smoking duration, years (SD)             | 25.9 (12)             | 25.3 (12)         | 31.1 (12)        |
| Mean smoking intensity, g/day (SD)            | 5.7 (9.1)             | 5.3 (9.0)         | 9.1 (10)         |
| Exposed to environmental tobacco smoke, n (%) | 449 (57)              | 403 (57)          | 46 (61)          |
| Physically active in leisure time, n (%)      | 432 (55)              | 404 (57)          | 28 (37)          |
| Mean fruit intake, g/day (SD)                 | 192 (145)             | 193 (146)         | 177 (129)        |
| Employed, n (%)                               | 612 (78)              | 559 (79)          | 53 (70)          |
| Marital status, n (%)                         | Single                | 45 (5.7)          | 35 (4.9)         |
|                                               | Married               | 558 (71)          | 507 (72)         |
|                                               | Divorced              | 136 (17)          | 125 (18)         |
|                                               | Widowed               | 46 (5.9)          | 42 (5.9)         |
| Years of Education<br>n (%)                   | < 8                   | 223 (28)          | 198 (28)         |
|                                               | 8 – 10                | 395 (50)          | 361 (51)         |
|                                               | ≥ 10                  | 167 (21)          | 150 (21)         |
| Comorbidity n (%)                             | Myocardial infarction | 13 (1.7)          | 9 (1.3)          |
|                                               | Stroke                | 4 (0.5)           | 3 (0.4)          |
|                                               | Diabetes              | 13 (1.7)          | 8 (1.1)          |
|                                               | Hypertension          | 155 (20)          | 126 (18)         |
|                                               | Hypercholesterolemia  | 46 (5.9)          | 45 (6.3)         |

SD = standard deviation

**Table 2 - Determinants at baseline of survival in 785 adults with incident asthma during follow-up (2013) among participants in the Danish Diet, Cancer and Health Cohort.**

|                             |                                                | Univariate<br>model<br>HR (95% CI) | Multivariate<br>model<br>HR (95% CI) |
|-----------------------------|------------------------------------------------|------------------------------------|--------------------------------------|
| Age                         | 50-55                                          | 1.00                               | -                                    |
|                             | 55-60                                          | 0.84 (0.33-2.14)                   |                                      |
|                             | 60-65                                          | 0.76 (0.28-2.08)                   |                                      |
| Sex                         | Female                                         | 1.00                               | 1.00                                 |
|                             | Male                                           | 1.76 (1.12-2.75)                   | 1.83 (1.14-2.93)                     |
| Body Mass index             | Underweight/Normal (<25<br>kg/m <sup>2</sup> ) | 1.00                               | -                                    |
|                             | Overweight (25-30 kg/m <sup>2</sup> )          | 1.56 (0.93-2.63)                   | -                                    |
|                             | Obese (≥ 30 kg/m <sup>2</sup> )                | 1.52 (0.79-2.91)                   | -                                    |
| Smoking                     | Never                                          | 1.00                               | 1.00                                 |
|                             | Previous                                       | 0.67 (0.38-1.18)                   | 0.59 (0.33-1.05)                     |
|                             | Current                                        | 1.64 (0.96-2.78)                   | 1.39 (0.81-2.38)                     |
| Activity in Leisure<br>Time | Inactive                                       | 1.00                               | 1.00                                 |
|                             | Active                                         | 0.47 (0.29-0.74)                   | 0.53 (0.33-0.85)                     |
| Mean fruit intake           | g/day                                          | 0.91 (0.76-1.07)                   | -                                    |
| Employment                  | Yes                                            | 1.00                               | 1.00                                 |
|                             | No                                             | 1.17 (0.70-1.96)                   | 1.04 (0.87-1.25)                     |
| Marital Status              | Single                                         | 2.77 (1.40-5.48)                   | 2.16 (2.06-4.40)                     |
|                             | Married                                        | 1.00                               | 1.00                                 |
|                             | Divorced                                       | 0.79 (0.41-1.51)                   | 0.76 (0.40-1.47)                     |
|                             | Widowed                                        | 0.83 (0.30-2.30)                   | 1.15 (0.40-3.27)                     |
| Myocardial infarction       | -                                              | 1.00                               | -                                    |
|                             | +                                              | 2.87 (1.04-7.89)                   | -                                    |
| Stroke                      | -                                              | 1.00                               | -                                    |
|                             | +                                              | 1.58 (0.22-11.43)                  | -                                    |
| Diabetes                    | -                                              | 1.00                               | 1.00                                 |
|                             | +                                              | 3.58 (1.44-8.90)                   | 2.42 (0.96-6.11)                     |
| Hypertension                | -                                              | 1.00                               | 1.00                                 |
|                             | +                                              | 2.57 (1.61-4.09)                   | 2.47 (1.54-3.95)                     |

HR = Hazard Ratio. CI = Confidence interval.

STROBE Statement—Checklist of items that should be included in reports of *cohort studies*

|                              | Item No | Recommendation                                                                                                                                                                                                                                                                                                                                            |
|------------------------------|---------|-----------------------------------------------------------------------------------------------------------------------------------------------------------------------------------------------------------------------------------------------------------------------------------------------------------------------------------------------------------|
| <b>Title and abstract</b>    | 1       | (a) Indicate the study's design with a commonly used term in the title or the abstract – page 1<br>(b) Provide in the abstract an informative and balanced summary of what was done and what was found<br>- page 2                                                                                                                                        |
| <b>Introduction</b>          |         |                                                                                                                                                                                                                                                                                                                                                           |
| Background/rationale         | 2       | Explain the scientific background and rationale for the investigation being reported<br>-page 3-4                                                                                                                                                                                                                                                         |
| Objectives                   | 3       | State specific objectives, including any prespecified hypotheses<br>-page 4                                                                                                                                                                                                                                                                               |
| <b>Methods</b>               |         |                                                                                                                                                                                                                                                                                                                                                           |
| Study design                 | 4       | Present key elements of study design early in the paper<br>-page 4                                                                                                                                                                                                                                                                                        |
| Setting                      | 5       | Describe the setting, locations, and relevant dates, including periods of recruitment, exposure, follow-up, and data collection<br>-page 4-5                                                                                                                                                                                                              |
| Participants                 | 6       | (a) Give the eligibility criteria, and the sources and methods of selection of participants. Describe methods of follow-up<br>-page 4-5<br>(b) For matched studies, give matching criteria and number of exposed and unexposed<br>- N/A                                                                                                                   |
| Variables                    | 7       | Clearly define all outcomes, exposures, predictors, potential confounders, and effect modifiers. Give diagnostic criteria, if applicable<br>-page 4-6                                                                                                                                                                                                     |
| Data sources/<br>measurement | 8*      | For each variable of interest, give sources of data and details of methods of assessment (measurement). Describe comparability of assessment methods if there is more than one group<br>-page 4-6                                                                                                                                                         |
| Bias                         | 9       | Describe any efforts to address potential sources of bias                                                                                                                                                                                                                                                                                                 |
| Study size                   | 10      | Explain how the study size was arrived at<br>-page 4-5                                                                                                                                                                                                                                                                                                    |
| Quantitative variables       | 11      | Explain how quantitative variables were handled in the analyses. If applicable, describe which groupings were chosen and why<br>Page- 5-6                                                                                                                                                                                                                 |
| Statistical methods          | 12      | (a) Describe all statistical methods, including those used to control for confounding<br>-page 6<br>(b) Describe any methods used to examine subgroups and interactions<br>-N/A<br>(c) Explain how missing data were addressed<br>-N/A<br>(d) If applicable, explain how loss to follow-up was addressed<br>(e) Describe any sensitivity analyses<br>-N/A |



| <b>Results</b>           |     |                                                                                                                                                                                                                                                                                                                                                                                                                                       |
|--------------------------|-----|---------------------------------------------------------------------------------------------------------------------------------------------------------------------------------------------------------------------------------------------------------------------------------------------------------------------------------------------------------------------------------------------------------------------------------------|
| Participants             | 13* | (a) Report numbers of individuals at each stage of study—eg numbers potentially eligible, examined for eligibility, confirmed eligible, included in the study, completing follow-up, and analysed<br>Page -4 and 8<br>(b) Give reasons for non-participation at each stage<br>-due to space limitations non-participation for the DCH cohort is available in the referenced previous articles.<br>(c) Consider use of a flow diagram  |
| Descriptive data         | 14* | (a) Give characteristics of study participants (eg demographic, clinical, social) and information on exposures and potential confounders<br>-table 1<br>(b) Indicate number of participants with missing data for each variable of interest<br>-N/A<br>(c) Summarise follow-up time (eg, average and total amount)<br>-page 8                                                                                                         |
| Outcome data             | 15* | Report numbers of outcome events or summary measures over time                                                                                                                                                                                                                                                                                                                                                                        |
| Main results             | 16  | (a) Give unadjusted estimates and, if applicable, confounder-adjusted estimates and their precision (eg, 95% confidence interval). Make clear which confounders were adjusted for and why they were included<br>-table 2<br>(b) Report category boundaries when continuous variables were categorized<br>-table 2<br>(c) If relevant, consider translating estimates of relative risk into absolute risk for a meaningful time period |
| Other analyses           | 17  | Report other analyses done—eg analyses of subgroups and interactions, and sensitivity analyses<br>-N/A                                                                                                                                                                                                                                                                                                                                |
| <b>Discussion</b>        |     |                                                                                                                                                                                                                                                                                                                                                                                                                                       |
| Key results              | 18  | Summarise key results with reference to study objectives<br>-page 8                                                                                                                                                                                                                                                                                                                                                                   |
| Limitations              | 19  | Discuss limitations of the study, taking into account sources of potential bias or imprecision. Discuss both direction and magnitude of any potential bias<br>Page 11-12                                                                                                                                                                                                                                                              |
| Interpretation           | 20  | Give a cautious overall interpretation of results considering objectives, limitations, multiplicity of analyses, results from similar studies, and other relevant evidence<br>-page 8-11                                                                                                                                                                                                                                              |
| Generalisability         | 21  | Discuss the generalisability (external validity) of the study results<br>-page 11                                                                                                                                                                                                                                                                                                                                                     |
| <b>Other information</b> |     |                                                                                                                                                                                                                                                                                                                                                                                                                                       |
| Funding                  | 22  | Give the source of funding and the role of the funders for the present study and, if applicable, for the original study on which the present article is based<br>-page 12                                                                                                                                                                                                                                                             |

\*Give information separately for exposed and unexposed groups.



1 **Note:** An Explanation and Elaboration article discusses each checklist item and gives methodological background and  
2 published examples of transparent reporting. The STROBE checklist is best used in conjunction with this article (freely  
3 available on the Web sites of PLoS Medicine at <http://www.plosmedicine.org/>, Annals of Internal Medicine at  
4 <http://www.annals.org/>, and Epidemiology at <http://www.epidem.com/>). Information on the STROBE Initiative is  
5 available at <http://www.strobe-statement.org>.  
6  
7  
8  
9  
10  
11  
12  
13  
14  
15  
16  
17  
18  
19  
20  
21  
22  
23  
24  
25  
26  
27  
28  
29  
30  
31  
32  
33  
34  
35  
36  
37  
38  
39  
40  
41  
42  
43  
44  
45  
46  
47  
48  
49  
50  
51  
52  
53  
54  
55  
56  
57  
58  
59  
60

For peer review only

# BMJ Open

## Demographic, lifestyle, and comorbid risk factors for all-cause mortality in a Danish cohort of middle-aged adults with incident asthma

|                                 |                                                                                                                                                                                                                                                                  |
|---------------------------------|------------------------------------------------------------------------------------------------------------------------------------------------------------------------------------------------------------------------------------------------------------------|
| Journal:                        | <i>BMJ Open</i>                                                                                                                                                                                                                                                  |
| Manuscript ID                   | bmjopen-2021-049243.R2                                                                                                                                                                                                                                           |
| Article Type:                   | Original research                                                                                                                                                                                                                                                |
| Date Submitted by the Author:   | 24-Jul-2021                                                                                                                                                                                                                                                      |
| Complete List of Authors:       | Tupper, Oliver Djurhuus; Hvidovre Hospital, Department of Respiratory Medicine<br>Andersen, ZJ; University of Copenhagen Department of Public Health, Section of Environmental Health<br>Ulrik, Charlotte; Hvidovre Hospital, Department of Respiratory Medicine |
| <b>Primary Subject Heading</b>: | Epidemiology                                                                                                                                                                                                                                                     |
| Secondary Subject Heading:      | Respiratory medicine                                                                                                                                                                                                                                             |
| Keywords:                       | Asthma < THORACIC MEDICINE, Epidemiology < THORACIC MEDICINE, Adult thoracic medicine < THORACIC MEDICINE                                                                                                                                                        |
|                                 |                                                                                                                                                                                                                                                                  |

SCHOLARONE™  
Manuscripts



I, the Submitting Author has the right to grant and does grant on behalf of all authors of the Work (as defined in the below author licence), an exclusive licence and/or a non-exclusive licence for contributions from authors who are: i) UK Crown employees; ii) where BMJ has agreed a CC-BY licence shall apply, and/or iii) in accordance with the terms applicable for US Federal Government officers or employees acting as part of their official duties; on a worldwide, perpetual, irrevocable, royalty-free basis to BMJ Publishing Group Ltd ("BMJ") its licensees and where the relevant Journal is co-owned by BMJ to the co-owners of the Journal, to publish the Work in this journal and any other BMJ products and to exploit all rights, as set out in our [licence](#).

The Submitting Author accepts and understands that any supply made under these terms is made by BMJ to the Submitting Author unless you are acting as an employee on behalf of your employer or a postgraduate student of an affiliated institution which is paying any applicable article publishing charge ("APC") for Open Access articles. Where the Submitting Author wishes to make the Work available on an Open Access basis (and intends to pay the relevant APC), the terms of reuse of such Open Access shall be governed by a Creative Commons licence – details of these licences and which [Creative Commons](#) licence will apply to this Work are set out in our licence referred to above.

Other than as permitted in any relevant BMJ Author's Self Archiving Policies, I confirm this Work has not been accepted for publication elsewhere, is not being considered for publication elsewhere and does not duplicate material already published. I confirm all authors consent to publication of this Work and authorise the granting of this licence.

1  
2  
3 **Demographic, lifestyle, and comorbid risk factors for all-cause**  
4  
5  
6 **mortality in a Danish cohort of middle-aged adults with**  
7  
8  
9 **incident asthma**

10  
11  
12  
13 Oliver Djurhuus Tupper<sup>1</sup>, Zorana Jovanovic Andersen<sup>2</sup>, and Charlotte

14  
15  
16 Suppli Ulrik<sup>1,3</sup>

17  
18  
19 <sup>1</sup> Department of Respiratory Medicine, Copenhagen University Hospital Hvidovre,  
20  
21 Denmark

22  
23  
24 <sup>2</sup> Section of Environmental Health, Department of Public health, University of  
25  
26 Copenhagen, Denmark

27  
28  
29 <sup>3</sup> Institute of Clinical Medicine, University of Copenhagen, Copenhagen, Denmark

30  
31 **Corresponding Author**

32  
33 Oliver Djurhuus Tupper MD, PhD

34  
35 Respiratory Research Unit

36  
37 Department of Respiratory Medicine

38  
39 Hvidovre Hospital

40  
41 Kettegård Alle 30

42  
43 DK-2650 Hvidovre

44  
45 E-mail [olivertupper@gmail.com](mailto:olivertupper@gmail.com)

46  
47  
48 Word count abstract: 248

49  
50 Word count main text: 2600

## Abstract

### Objectives:

We aimed to identify factors associated with all-cause mortality in adults with incident asthma.

### Design and setting:

Cross-sectional cohort study, in the metropolitan areas of Copenhagen and Aarhus, Denmark.

### Participants:

Adults aged 50–64 years enrolled in the Danish Diet, Cancer, and Health cohort were followed from baseline (1993–1997) in the National Patients Registry for first-time admissions for asthma and vital status. We defined incident asthma as at least one first-time hospital admission with asthma as the primary registered diagnosis between baseline and end of follow-up (2013) in participants without previously known asthma. Among the cohort comprising 57 053 individuals, we identified 785 adults (aged 50–64) with incident asthma, of whom 76 died during follow-up.

### Primary and secondary outcome measures:

Baseline reported socioeconomic and lifestyle traits, and comorbidities associated with all-cause mortality.

### Results:

Self-reported leisure-time physical activity was associated with a substantial reduction in risk with an HR of 0.53 (95 % CI 0.33–0.85). Being male, single, and having a diagnosis of hypertension or diabetes were associated with an increased risk of all-cause mortality

1  
2  
3 with an HR of 1.83 (95 % CI 1.14–2.38), 2.16 (95 % CI 2.06–4.40), 2.47 (95 % CI 1.54–  
4  
5 3.95) and of 2.42 (95 % CI 0.96–6.11), respectively.

### 6 7 8 Conclusions:

9  
10 This long-term study of adults with hospital contacts for incident asthma revealed  
11  
12 that self-reported leisure-time physical activity is associated with an approximately  
13  
14 50% reduction in all-cause mortality. In contrast, both hypertension and diabetes  
15  
16 were associated with a higher risk of mortality.  
17  
18

### 19 20 21 22 **Strengths and limitations of this study:**

- 23  
24 • The present study is one of very few reporting on how physical activity and  
25  
26 comorbidities are associated with all-cause mortality in adults with asthma.  
27
- 28  
29 • Seven hundred eighty-five persons with incident asthma were followed-up  
30  
31 for 20 years, with no loss to follow-up.  
32
- 33  
34 • The diagnosis of asthma is based on register information and not an objective  
35  
36 assessment.  
37
- 38  
39 • There are only very few events among those with previous myocardial  
40  
41 infarction and stroke.  
42  
43  
44  
45

46 **Keywords:** Asthma, middle-aged adults, population cohort, comorbidities, long-term

47  
48 **Short Title:** Physical activity and asthma mortality

## 49 50 51 **Introduction**

52  
53 With over 300 million persons worldwide suffering from asthma and many deaths each  
54  
55 year, asthma is a disease that continually requires attention.[1,2] Asthma remains a  
56  
57 disease that carries increased mortality compared with general populations.[3,4]  
58  
59  
60

1  
2  
3 Asthma-specific mortality has, overall, been on a steady decline since the 1950s.[5–7]  
4  
5  
6 However, a study based on the WHO Mortality Database found that mortality trends  
7  
8 have plateaued, with no significant change in mortality between 2006 and 2012.[8]  
9  
10  
11 Furthermore, a British report from 2014 reported that over 67% of deaths related to  
12  
13 asthma were potentially preventable.[9]

14  
15 Asthma-specific mortality alone does not provide the whole picture when evaluating the  
16  
17 risks of the disease for individual patients. A study assessing deaths with asthma as a  
18  
19 contributing factor, in addition to asthma-specific causes, found that asthma as a  
20  
21 contributing factor was associated with more than twice as many deaths compared with  
22  
23 asthma-specific deaths alone.[10] Studies suggest that patients with asthma are more  
24  
25 prone to acquire other chronic conditions than the background population.[11–13] As  
26  
27 the impact of factors as multimorbidity on all-cause mortality is an area with a paucity  
28  
29 of data, a need for studies in these areas exists.[14] The association between physical  
30  
31 activity and long-term mortality has been well established in the general population and  
32  
33 patients with COPD.[15,16] However, this has not been examined extensively in  
34  
35 asthma.[17] The impact of physical activity on asthma-specific factors, such as disease  
36  
37 control, lung function, and exacerbations has been well researched.[17]

38  
39 Based on the currently available knowledge, it remains of utmost to further explore  
40  
41 factors associated with asthma-related mortality, including not least all-cause mortality.  
42  
43 The present study aimed to examine demographic, lifestyle and comorbid factors  
44  
45 associated with long-term all-cause mortality in adults with incident asthma from a large  
46  
47 Danish cohort.  
48  
49  
50  
51  
52  
53  
54  
55  
56  
57  
58  
59  
60

## Methods

Characteristics of the Diet, Cancer, and Health (DCH) cohort have been published previously, with a full description of the cohort.[18,19] A total of 160,725 individuals (72,729 women) were invited to participate in the DCH Cohort between 1993 and 1997. All individuals resided in either Copenhagen or Aarhus, which are the two largest cities in Denmark. To be invited, participants had to be 50–64 years of age and have no record of cancer at the time of inclusion. A total of 57,053 individuals (52.4% women, n=29,875) were enrolled in the study after accepting the invitation. The Central Danish Ethics Committee approved the main study of the DCH-cohort. The regional Danish Ethics Committee approved this sub-study (H-17025043) and the Danish Data Protection Agency (2014-41-3468). All participants provided written informed consent. Baseline factors were determined based on a comprehensive questionnaire completed by the participants. The questionnaire consisted of questions on general health and diet; demographic factors, including education and occupation; questions on lifestyle, including tobacco exposure; and pre-existing diseases, including asthma, COPD, diabetes, and cardiovascular disease.

### *Study cohort*

Participants in the DCH cohort were defined as having incident asthma and included in the present analyses as cases if they had the first-ever admission to a hospital, emergency department, or outpatient clinic with a primary diagnosis of asthma, which occurred between cohort baseline (1993-1997) and July 1<sup>st</sup>, 2013. Asthma was classified according to the International Classification of Diseases (ICD) as ICD-10 codes DJ45–46 and ICD-8 codes 493.00–493.09. Participants with a self-reported diagnosis of asthma



1  
2  
3 or COPD at baseline were excluded. Participants in the DCH cohort were linked to the  
4  
5 Danish National Patient Registry (DNPR) to extract hospital contacts from 1993-1997  
6  
7 until July 1<sup>st</sup>, 2013.[20] The link between the DCH and DNPR was done using the unique  
8  
9 identifier all Danish residents have. Every discharge diagnosis from all Danish hospitals  
10  
11 since 1978 and from outpatient clinics since 1995 are gathered in the DNPR.[21] In  
12  
13 addition to hospital contacts, we gathered emergency room visits and visits to  
14  
15 respiratory outpatient clinics. Cases were followed from first-ever asthma admission  
16  
17 until the time of death, emigration, or July 1<sup>st</sup>, 2013, whichever came first.  
18  
19  
20  
21  
22  
23  
24

25 Physical activity in leisure time was determined based on a participant completed  
26  
27 questionnaire. An interviewer checked the questionnaire. Participants reported the  
28  
29 number of hours per week they did leisure time and transport-related (i.e., to and from  
30  
31 work, shopping) physical activity. Leisure-time physical activity was reported separately  
32  
33 for summer and winter of the previous year. It was allocated in the following categories:  
34  
35 cycling, "do-it-yourself" activities (i.e., home improvements), gardening, housework  
36  
37 (cleaning, laundry), sports, and walking. The two values for summer and winter were  
38  
39 averaged. The questions used have previously been validated in two studies by Peters  
40  
41 et al and Cust et al that found high correlations with movement sensing measurement  
42  
43 and accelerometer measurements, respectively.[22,23] Participants reported as being  
44  
45 physically active in leisure time, spent at least half an hour a week on at least one of the  
46  
47  
48  
49  
50  
51  
52 six categories.  
53  
54  
55  
56

## 57 Statistical Analyses

58  
59  
60

1  
2  
3 Associations between baseline factors and all-cause mortality were examined using the  
4  
5 Cox proportional hazards model with age as the underlying time scale. We examined the  
6  
7 following baseline factors identified at recruitment between 1993 and 1999: age, sex,  
8  
9 BMI, length of education, employment and civil status, tobacco history, occupational  
10  
11 exposure, leisure-time physical activity, fruit consumption, and comorbidities. Baseline  
12  
13 factors were assessed in a two-step process: Step one, in a univariate model, with age  
14  
15 as the underlying time scale. Step two was in a multivariate model that included only  
16  
17 variables associated with all-cause mortality, defined by backward elimination. The  
18  
19 proportional hazards assumption was evaluated by testing for a non-zero slope in a  
20  
21 generalised linear regression of the scaled Schoenfeld residuals on functions of time.  
22  
23 The univariate and multivariate model results are presented as hazard ratios (HRs) with  
24  
25 95% confidence intervals (CIs). Stata, version 11.2, was used to perform statistical  
26  
27 analyses.  
28  
29  
30  
31  
32  
33  
34  
35  
36  
37  
38

### *Patient and Public Involvement*

39 Patients and the public were not involved in the design of the study.  
40  
41  
42  
43  
44

## **Results**

45  
46  
47 We identified 785 adults with an incident diagnosis of asthma and fulfilled the criteria  
48  
49 for inclusion in the present analyses. No individuals were lost to follow-up, and  
50  
51 therefore complete data were available for all 785 individuals. All characteristics  
52  
53 included in the following analyses were obtained at baseline.  
54  
55  
56  
57  
58  
59  
60

1  
2  
3 Between baseline and July 1<sup>st</sup>, 2013, 76 of the identified adults with incident asthma  
4  
5 died. The majority of cases with incident asthma were women 63% (n=495). Only 45%  
6  
7 (n=351) were never smokers at baseline. Interestingly, a substantial proportion of  
8  
9 ever-smokers were ex-smokers (60%, n=260) and not current smokers (40%, n=174).  
10  
11 The amount of tobacco exposure was much higher among those who died than those  
12  
13 with incident asthma still alive at the end of follow-up. On average, persons who died  
14  
15 smoked 3.8 grams of tobacco per day, corresponding to 72% more than those alive at  
16  
17 the end of follow-up. Those who died had a daily intake of fruit that was 16 g (or 8.3 %)  
18  
19 less than those still alive. Further characteristics are shown in Table 1.  
20  
21  
22  
23  
24  
25  
26  
27

28 Of the baseline characteristics included in the analyses, the following were found to be  
29  
30 associated with all-cause mortality and were therefore included in the final model: (1)  
31  
32 sex, (2) smoking status, (3) physical activity in leisure time, (5) employment status, (6)  
33  
34 marital status, (7) diabetes and (8) hypertension. On the other hand, age and a  
35  
36 previous diagnosis of myocardial infarction or stroke lacked power for precise  
37  
38 estimates for all-cause mortality in univariate analyses and were therefore not  
39  
40 included in the final model.  
41  
42  
43  
44

45 Male sex was associated with a higher risk for all-cause mortality (HR 1.83, 95% CI  
46  
47 1.14-2.93).  
48

49 Persons who reported being single had a higher mortality risk (HR of 2.16 95% CI 2.06-  
50  
51 4.40) compared with persons who reported being married.  
52

53 A diagnosis of hypertension was associated with a substantially increased risk of all-  
54  
55 cause mortality (HR 2.47, 95% CI 1.54–3.95). Self-reported previous myocardial  
56  
57 infarction and a current diagnosis of diabetes had imprecise estimates associated with  
58  
59  
60

1  
2  
3 all-cause mortality, although, notably, robust associations were detected. We found an  
4  
5 HR of 2.87 (95% CI 1.04-7.89) in the univariate model for myocardial infarction. An HR  
6  
7 of 2.42 (95% CI 0.96-6.11) for diabetes was found in the multivariate model. There was  
8  
9 not found an association between previous stroke and all-cause mortality.  
10  
11

12  
13 The self-reported leisure-time physical activity showed a substantial reduction in all-  
14  
15 cause mortality (HR 0.53, 95% CI 0.33–0.85).  
16

17  
18 Mean daily fruit intake was not found to be associated with death (table 2).  
19  
20

## 21 22 **Discussion**

23  
24  
25 In this Danish cohort of 785 adults with incident asthma followed for 20 years, we found  
26  
27 that physical activity was associated with a lower risk of all-cause mortality. In contrast,  
28  
29 being unmarried or having hypertension were associated with increased all-cause  
30  
31 mortality.  
32  
33

### 34 35 *Physical Activity*

36  
37  
38 To the best of our knowledge, this is the first cohort study that has reported the  
39  
40 association between self-reported physical activity and all-cause mortality, specifically  
41  
42 in individuals with asthma. Physical activity has previously been shown to have a  
43  
44 positive effect on multiple aspects of asthma.[17] Particularly relevant are two studies  
45  
46 by Garcia-Aymerich et al[24] and Fisher et al[25] that found a protective effect of self-  
47  
48 reported physical activity on hospitalisation with asthma exacerbations. While the  
49  
50 same effect could not be found on readmissions for exacerbations in the study by  
51  
52 Fisher et al[25], their findings are essential support of our findings, as exacerbations  
53  
54 are associated with morbidity and mortality.[26] Physical activity also appears to have  
55  
56  
57  
58  
59  
60

1  
2  
3 a positive effect on asthma control.[27] However, BMI appears to be more critical,  
4  
5 negating the effects of physical activity in some, but not all, models.[17] It appears that  
6  
7 if persons with asthma do a moderate level of physical activity compared with  
8  
9 inactivity and strenuous physical activity, asthma control is positively affected.[28] The  
10  
11 positive effects on these other asthma outcomes could support our finding that  
12  
13 physical activity is associated with lower mortality risk.  
14  
15

16  
17 The effects of physical activity are prudent to establish as we know that persons with  
18  
19 asthma generally are less physically active than the general population.[29] Further,  
20  
21 we know from a Cochrane review from 2013 that physical activity is well-tolerated and  
22  
23 safe for individuals with asthma.[30] The review found that physical activity may  
24  
25 improve cardiopulmonary function in individuals with asthma without a negative  
26  
27 impact on pulmonary function. Furthermore, the Cochrane review is based on shorter-  
28  
29 term studies. Long-term findings from the Copenhagen City Heart study suggest that  
30  
31 physical activity may diminish long-term lung function decline in individuals with  
32  
33 asthma.[31] The amount of physical activity required to be defined as physically active  
34  
35 in our study is relatively low and, therefore, should be attainable by most. However,  
36  
37 future studies should explore whether there are additional benefits from moderate  
38  
39 and high levels of activity. Additionally, would a high or very high level of activity mean  
40  
41 the risks of adverse outcomes outweigh the benefits? A study by Russell et al.[32]  
42  
43 found that the benefits of physical activity on asthma symptoms were only present at  
44  
45 light levels of activity and not at intense activity levels. Based on our findings, there is  
46  
47 absolutely reason to motivate persons with asthma to do some form of physical  
48  
49 activity in their leisure time.  
50  
51  
52  
53  
54  
55  
56  
57  
58  
59  
60

### *Comorbidities*

Hypertension had a strong association with death. Overall all included comorbid conditions at baseline appeared to be associated with a higher risk of death. However, only hypertension had a robust estimate, probably since the remaining comorbidities (diabetes, stroke and myocardial infarction) had a relatively low prevalence at baseline.

There is limited research on how hypertension relates to mortality in a person with asthma.[14] We found one other study by Sumino et al[33] from 2014 that report the association between hypertension and mortality. They found a lower OR for mortality among individuals with hypertension for individuals over the age of 65 years. However, the study by Sumino et al[33] had a much shorter follow-up of three years compared with the 20 years of our study. Given that hypertension is a condition that gives long-term complications, these complications are likely not caught across such a short period.

While the estimated hazard ratio for mortality among those with diabetes was imprecise due to lack of power, it is worth mentioning that there appeared to be a strong association between diabetes and a higher risk of all-cause mortality. While the amount of other studies is exceedingly limited, there is other literature supporting this finding.

The study by Sumino et al[33] found that diabetes was associated with a higher mortality rate in persons over the age of 65. Another cohort study by Koskela et al[34] showed that among 110 patients admitted due to an asthma exacerbation, there was a higher risk of mortality for those with diabetes. While there is a clear trend in our data towards higher all-cause mortality risk for individuals with previous myocardial infarction, the HR estimate was imprecise once again due to only four events. Nevertheless, an excess risk of mortality due to cardiovascular disease is an area that has substantial data supporting it in asthma cohorts, and this certainly supports our finding.[35,36]

1  
2  
3 The factors presented in this paper may seem obvious but needs to be verified in asthma  
4  
5 mainly, as many of these factors have not previously been explored in relation to adults  
6  
7 with asthma. Not least in large cohorts, as in the present long-term follow-up study of a  
8  
9 large cohort of middle-aged men and women with asthma. The relevance of this is due  
10  
11 to the systemic inflammation present in persons with asthma, which potentially could  
12  
13 affect and change which factors are essential to be aware of compared with general  
14  
15 populations.[37,38]  
16  
17  
18  
19  
20  
21  
22  
23  
24

### 25 *Limitations*

26  
27 The diagnosis of asthma in the included subjects was based on ICD-10 codes connected  
28  
29 to hospital contacts, which is not as accurate as objectively verified asthma. However,  
30  
31 this has previously been established by Jensen et al[39] to be a robust method of  
32  
33 identifying persons with asthma. The positive predictive value was found to be 65%;  
34  
35 despite this, they discovered that associations found are still relevant. Selecting only  
36  
37 persons with either a hospital or outpatient contact means we may limit  
38  
39 generalisability, with the majority of persons included may have moderate or severe  
40  
41 disease. Nonetheless, a study from 2014 found that upwards of 25% of asthma  
42  
43 patients with mild to moderate disease experience poor asthma control and hospital  
44  
45 admissions.[40]  
46  
47  
48  
49  
50

51  
52 The prevalence of asthma in this cohort is low (about 1%), substantially lower than the  
53  
54 current reported prevalence in Denmark of 10%; therefore, the generalizability is  
55  
56 limited. The low prevalence is due to only including participants without a previous  
57  
58 diagnosis of asthma and only included individuals referred to secondary care.  
59  
60

1  
2  
3 Our definition of physical activity was based on self-reported information, which carries  
4 a certain degree of bias. Additionally, a potential limitation is that the degree of self-  
5 reported physical activity for some was reported multiple years before the first contact  
6 for incident asthma. We can, therefore, not be sure that the level of physical activity still  
7 applies at follow-up. However, previous literature suggests that physical activity tracks  
8 well over time, particularly in adulthood.[41,42]  
9

10 We did not have information on the specific cause of death and could not examine  
11 factors relating to asthma-specific mortality. Furthermore, we did not have data on  
12 asthma severity, medication, pulmonary function and previous exacerbation, which  
13 influences mortality risk.  
14

15 As the number of events in this cohort study was not substantial, there is a risk of both  
16 under and overestimating the importance of the identified risk factors. Therefore, the  
17 results of this study cannot stand on their own, yet it provides a valuable source for  
18 future studies. This is particularly evident for diabetes, which shows a clear trend for a  
19 higher risk of mortality, though it lacks the power for a precise estimate.  
20  
21  
22  
23  
24  
25  
26  
27  
28  
29  
30  
31  
32  
33  
34  
35  
36  
37  
38  
39  
40  
41

## 42 *Conclusions*

43  
44 Our study has shown that for middle-aged individuals with hospital contact for incident  
45 asthma, there appears to be increased mortality for persons with comorbidity. In  
46 contrast, leisure-time physical activity was found to have a protective effect on mortality  
47 risk.  
48  
49  
50  
51  
52  
53  
54  
55  
56

## 57 **Abbreviations:**

58 BMI = Body Mass Index  
59  
60



1  
2  
3 DCH = Diet Cancer and Health Cohort

4  
5 HR = Hazard Ratio

6  
7 OR = Odds Ratio

8  
9  
10  
11 **Declarations**

12  
13 **Ethics approval and consent to participate:** The study was approved by the ethical  
14  
15 committee for the Capital Region of Denmark (H-17025043), the regional data safety  
16  
17 committee for the capital region of Denmark (P-2019-712), and The Danish Data  
18  
19 Protection Agency (2014-41-3468). All participants signed an informed consent form.

20  
21  
22  
23 **Funding:** This research did not receive any specific grant from funding agencies in  
24  
25 the public, commercial, or not-for-profit sectors.

26  
27  
28 **Competing interests:** ODT, ZJA and CSU have no perceived conflicts of interest in  
29  
30 relation to this study.

31  
32  
33 **Authors' contributions:** Conception and design—ODT, ZJA and CSU.; preparation of  
34  
35 data and statistical analyses - ZJA.; statistical interpretation and drafted the  
36  
37 manuscript—ODT; all authors critically reviewed and accepted the final version of the  
38  
39 manuscript.

40  
41  
42 **Availability of data and material:** The data are available upon reasonable request, but  
43  
44 analysis may require approval from the regional data safety committee for the capital  
45  
46 region of Denmark (Videnscenter for dataanmeldelser).

47  
48  
49 **Acknowledgements:** Thanks to Anne Tjønneland and Kim Overvad for providing us  
50  
51 with access to the data from the Diet, Cancer and Health cohort.

## References

- 1 WHO. Global surveillance, prevention and control of chronic respiratory diseases: a comprehensive approach. <http://www.who.int/gard/publications/GARD Book 2007.pdf?ua=1>
- 2 Global strategy for asthma management and prevention. Glob. Initiat. Asthma. 2020. <https://ginasthma.org> (accessed 16 Jun 2020).
- 3 Huovinen E, Kaprio J, Vesterinen E, *et al.* Mortality of adults with asthma: A prospective cohort study. *Thorax* 1997;**52**:49–54. doi:10.1136/thx.52.1.49
- 4 D'Amato G, Vitale C, Molino A, *et al.* Asthma-related deaths. *Multidiscip Respir Med* 2016;**11**:1–5. doi:10.1186/s40248-016-0073-0
- 5 Speizer FE, Doll R, Heaf P. Observations on Recent Increase in Mortality from Asthma. *Br Med J* 1968;**1**:335–9. doi:10.1136/bmj.1.5588.335
- 6 Jackson RT, Beaglehole R, Rea HH, *et al.* Mortality from asthma: A new epidemic in New Zealand. *Br Med J* 1982;**285**:771–4. doi:10.1136/bmj.285.6344.771
- 7 Sly RM. Mortality from asthma, 1979–1984. *J Allergy Clin Immunol* 1988;**82**:705–17. doi:10.1016/0091-6749(88)90069-3
- 8 Ebmeier S, Thayabaran D, Braithwaite I, *et al.* Trends in international asthma mortality: analysis of data from the WHO Mortality Database from 46 countries (1993–2012). *Lancet* 2017;**390**:935–45. doi:10.1016/S0140-6736(17)31448-4
- 9 Levy ML. The national review of asthma deaths: What did we learn and what needs to change? *Breathe* 2015;**11**:15–24. doi:10.1183/20734735.008914
- 10 McCoy L, Redelings M, Sorvillo F, *et al.* A multiple cause-of-death analysis of asthma mortality in the United States, 1990–2001. *J Asthma* 2005;**42**:757–63. doi:10.1080/02770900500308189
- 11 Soriano JB, Visick GT, Muellerova H, *et al.* Patterns of comorbidities in newly diagnosed COPD and asthma in primary care. *Chest* 2005;**128**:2099–107. doi:10.1378/chest.128.4.2099
- 12 Gershon AS, Wang C, Guan J, *et al.* Burden of comorbidity in individuals with asthma. *Thorax* 2010;**65**:612–8. doi:10.1136/thx.2009.131078
- 13 Adams RJ, Wilson DH, Taylor AW, *et al.* Coexistent chronic conditions and asthma quality of life: A population-based study. *Chest* 2006;**129**:285–91. doi:10.1378/chest.129.2.285
- 14 Marques de Mello L, Cruz AA. A proposed scheme to cope with comorbidities in asthma. *Pulm Pharmacol Ther* 2018;**52**:41–51. doi:10.1016/j.pupt.2018.08.005
- 15 Lear SA, Hu W, Rangarajan S, *et al.* The effect of physical activity on mortality and cardiovascular disease in 130 000 people from 17 high-income, middle-income, and low-income countries: the PURE study. *Lancet* 2017;**390**:2643–54. doi:10.1016/s0140-6736(17)31634-3
- 16 Waschki B, Kirsten A, Holz O, *et al.* Physical activity is the strongest predictor of all-cause mortality in patients with COPD: a prospective cohort study. *Chest* 2011;**140**:331–42. doi:10.1378/chest.10-2521
- 17 Cordova-Rivera L, Gibson PG, Gardiner PA, *et al.* A Systematic Review of Associations of Physical Activity and Sedentary Time with Asthma Outcomes. *J Allergy Clin Immunol Pr* 2018;**6**:1968–1981 e2. doi:10.1016/j.jaip.2018.02.027
- 18 Tjønneland A, Olsen A, Boll K, *et al.* Study design, exposure variables, and socioeconomic determinants of participation in Diet, Cancer and Health: a population-based prospective cohort study of 57,053 men and women in

- Denmark. *Scand J Public Health* 2007;**35**:432–41. doi:10.1080/14034940601047986
- 19 Bønnelykke K, Raaschou-Nielsen O, Tjønneland A, *et al.* Postmenopausal hormone therapy and asthma-related hospital admission. *J Allergy Clin Immunol* 2015;**135**:813–816.e5. doi:10.1016/j.jaci.2014.11.019
- 20 Pedersen CB. The Danish Civil Registration System. *Scand J Public Health* 2011;**39**:22–5. doi:10.1177/1403494810387965
- 21 Schmidt M, Schmidt SAJ, Sandegaard JL, *et al.* The Danish National Patient Registry: a review of content, data quality, and research potential. *Clin Epidemiol* 2015;**7**:449. doi:10.2147/CLEP.S91125
- 22 Cust AE, Smith BJ, Chau J, *et al.* Validity and repeatability of the EPIC physical activity questionnaire: A validation study using accelerometers as an objective measure. *Int J Behav Nutr Phys Act* 2008;**5**:33. doi:10.1186/1479-5868-5-33
- 23 Peters T, Brage S, Westgate K, *et al.* Validity of a short questionnaire to assess physical activity in 10 European countries. *Eur J Epidemiol* 2012;**27**:15–25. doi:10.1007/s10654-011-9625-y
- 24 Garcia-Aymerich J, Varraso R, Antó JM, *et al.* Prospective study of physical activity and risk of asthma exacerbations in older women. *Am J Respir Crit Care Med* 2009;**179**:999–1003. doi:10.1164/rccm.200812-1929OC
- 25 Fisher JE, Loft S, Ulrik CS, *et al.* Physical Activity, Air Pollution, and the Risk of Asthma and Chronic Obstructive Pulmonary Disease. *Am J Respir Crit Care Med* 2016;**194**:855–65. doi:10.1164/rccm.201510-2036OC
- 26 Chippes BE, Zeiger RS, Borish L, *et al.* Key findings and clinical implications from the Epidemiology and Natural History of Asthma: Outcomes and Treatment Regimens (TENOR) study. *J Allergy Clin Immunol* 2012;**130**:332–342.e10. doi:10.1016/j.jaci.2012.04.014
- 27 Panagiotou M, Koulouris NG, Rovina N. Physical Activity: A Missing Link in Asthma Care. *J Clin Med* 2020;**9**:706. doi:10.3390/jcm9030706
- 28 Del Giacco SR, Firinu D, Bjermer L, *et al.* Exercise and asthma: an overview. *Eur Clin Respir J* 2015;**2**:27984. doi:10.3402/ecrj.v2.27984
- 29 van 't Hul AJ, Frouws S, van den Akker E, *et al.* Decreased physical activity in adults with bronchial asthma. *Respir Med* 2016;**114**:72–7. doi:10.1016/j.rmed.2016.03.016
- 30 Kv C, Mg C, Picot J, *et al.* Physical training for asthma ( Review ) SUMMARY OF FINDINGS FOR THE MAIN COMPARISON. *Cochrane Libr* 2013;:1–73. doi:10.1002/14651858.CD001116.pub4.www.cochranelibrary.com
- 31 Garcia-Aymerich J, Lange P, Benet M, *et al.* Regular physical activity modifies smoking-related lung function decline and reduces risk of chronic obstructive pulmonary disease: A population-based cohort study. *Am J Respir Crit Care Med* 2007;**175**:458–63. doi:10.1164/rccm.200607-896OC
- 32 Russell MA, Janson C, Real FG, *et al.* Physical activity and asthma: A longitudinal and multi-country study. *J Asthma* 2017;**54**:938–45. doi:10.1080/02770903.2017.1281293
- 33 Sumino K, O'Brian K, Bartle B, *et al.* Coexisting chronic conditions associated with mortality and morbidity in adult patients with asthma. *J Asthma* 2014;**51**:306–14. doi:10.3109/02770903.2013.879881
- 34 Koskela HO, Salonen PH, Romppanen J, *et al.* A history of diabetes but not

- 1  
2  
3 hyperglycaemia during exacerbation of obstructive lung disease has impact on  
4 long-term mortality: A prospective, observational cohort study. *BMJ Open*  
5 2015;**5**:6794. doi:10.1136/bmjopen-2014-006794  
6  
7 35 Xu M, Xu J, Yang X. Asthma and risk of cardiovascular disease or all-cause  
8 mortality: A meta-analysis. *Ann Saudi Med* 2017;**37**:99–105. doi:10.5144/0256-  
9 4947.2017.99  
10  
11 36 Strand LB, Tsai MK, Wen CP, *et al*. Is having asthma associated with an increased  
12 risk of dying from cardiovascular disease? A prospective cohort study of 446 346  
13 Taiwanese adults. *BMJ Open* 2018;**8**. doi:10.1136/bmjopen-2017-019992  
14  
15 37 Denburg JA, Sehmi R, Saito H, *et al*. Systemic aspects of allergic disease: Bone  
16 marrow responses. *J Allergy Clin Immunol* 2000;**106**:S242–6.  
17 doi:10.1067/mai.2000.110156  
18  
19 38 Bjermer L. Time for a paradigm shift in asthma treatment: From relieving  
20 bronchospasm to controlling systemic inflammation. *J Allergy Clin Immunol*  
21 2007;**120**:1269–75. doi:10.1016/j.jaci.2007.09.017  
22  
23 39 Jensen AO, Nielsen GL, Ehrenstein V. Validity of asthma diagnoses in the Danish  
24 National Registry of Patients, including an assessment of impact of  
25 misclassification on risk estimates in an actual dataset. *Clin Epidemiol*  
26 2010;**2**:67–72. <https://www.ncbi.nlm.nih.gov/pubmed/20865105>  
27  
28 40 von Bülow A, Kriegbaum M, Backer V, *et al*. The Prevalence of Severe Asthma  
29 and Low Asthma Control Among Danish Adults. *J Allergy Clin Immunol Pract*  
30 2014;**2**:759-767.e2. doi:10.1016/j.jaip.2014.05.005  
31  
32 41 Telama R. Tracking of physical activity from childhood to adulthood: A review.  
33 *Obes. Facts.* 2009;**2**:187–95. doi:10.1159/000222244  
34  
35 42 Mertens E, Clarys P, Mullie P, *et al*. Stability of physical activity, fitness  
36 components and diet quality indices. *Eur J Clin Nutr* 2017;**71**:519–24.  
37 doi:10.1038/ejcn.2016.172  
38  
39  
40  
41  
42  
43  
44  
45  
46  
47  
48  
49  
50  
51  
52  
53  
54  
55  
56  
57  
58  
59  
60

## Tables

**Table 1 – Baseline characteristics of 785 adults enrolled in the Danish Diet, Cancer and Health Cohort with incident asthma between baseline (1993-1997) and follow-up (July**

|                                               | 2013                  | Asthma<br>(N = 785) | Alive<br>(N= 709) | Dead<br>(N = 76) |
|-----------------------------------------------|-----------------------|---------------------|-------------------|------------------|
| Age 50-55, n (%)                              |                       | 50 (6.4)            | 44 (6.2)          | 6 (7.9)          |
| Age 55-60, n (%)                              |                       | 155 (19.7)          | 136 (19.2)        | 19 (25.0)        |
| Age 60-65, n (%)                              |                       | 580 (73.9)          | 529 (74.6)        | 51 (67.1)        |
| Men, n (%)                                    |                       | 290 (37)            | 136 (19)          | 19 (25)          |
| Mean body mass index (kg/m <sup>2</sup> )     |                       | 26.5 (12)           | 26.4 (4.2)        | 27.1 (4.6)       |
| Smoking history, n (%)                        | Never                 | 351 (45)            | 318 (45)          | 33 (43)          |
|                                               | Previous              | 260 (33)            | 241 (34)          | 33 (25)          |
|                                               | Current               | 174 (22)            | 150 (21)          | 19 (32)          |
| Mean smoking duration, years (SD)             |                       | 25.9 (12)           | 25.3 (12)         | 31.1 (12)        |
| Mean smoking intensity, g/day (SD)            |                       | 5.7 (9.1)           | 5.3 (9.0)         | 9.1 (10)         |
| Exposed to environmental tobacco smoke, n (%) |                       | 449 (57)            | 403 (57)          | 46 (61)          |
| Physically active in leisure time, n (%)      |                       | 432 (55)            | 404 (57)          | 28 (37)          |
| Mean fruit intake, g/day (SD)                 |                       | 192 (145)           | 193 (146)         | 177 (129)        |
| Employed, n (%)                               |                       | 612 (78)            | 559 (79)          | 53 (70)          |
| Marital status, n (%)                         | Single                | 45 (5.7)            | 35 (4.9)          | 10 (13)          |
|                                               | Married               | 558 (71)            | 507 (72)          | 51 (67)          |
|                                               | Divorced              | 136 (17)            | 125 (18)          | 11 (16)          |
|                                               | Widowed               | 46 (5.9)            | 42 (5.9)          | 4 (5.3)          |
| Years of Education<br>n (%)                   | < 8                   | 223 (28)            | 198 (28)          | 25 (33)          |
|                                               | 8 – 10                | 395 (50)            | 361 (51)          | 34 (45)          |
|                                               | ≥ 10                  | 167 (21)            | 150 (21)          | 23 (30)          |
| Comorbidity n (%)                             | Myocardial infarction | 13 (1.7)            | 9 (1.3)           | 4 (5.3)          |
|                                               | Stroke                | 4 (0.5)             | 3 (0.4)           | 1 (1.3)          |
|                                               | Diabetes              | 13 (1.7)            | 8 (1.1)           | 5 (6.6)          |
|                                               | Hypertension          | 155 (20)            | 126 (18)          | 29 (38)          |
|                                               | Hypercholesterolemia  | 46 (5.9)            | 45 (6.3)          | 1 (1.3)          |

SD = standard deviation

**Table 2 - Determinants at baseline of survival in 785 adults with incident asthma during follow-up (2013) among participants in the Danish Diet, Cancer and Health Cohort.**

|                                 |                                             | Univariate<br>model<br>HR (95% CI) | Multivariate<br>model<br>HR (95% CI) |
|---------------------------------|---------------------------------------------|------------------------------------|--------------------------------------|
| <b>Age</b>                      | 50-55                                       | 1.00                               | -                                    |
|                                 | 55-60                                       | 0.84 (0.33-2.14)                   |                                      |
|                                 | 60-65                                       | 0.76 (0.28-2.08)                   |                                      |
| <b>Sex</b>                      | Female                                      | 1.00                               | 1.00                                 |
|                                 | Male                                        | 1.76 (1.12-2.75)                   | 1.83 (1.14-2.93)                     |
| <b>Body Mass index</b>          | Underweight/Normal (<25 kg/m <sup>2</sup> ) | 1.00                               | -                                    |
|                                 | Overweight (25-30 kg/m <sup>2</sup> )       | 1.56 (0.93-2.63)                   | -                                    |
|                                 | Obese (≥ 30 kg/m <sup>2</sup> )             | 1.52 (0.79-2.91)                   | -                                    |
| <b>Smoking</b>                  | Never                                       | 1.00                               | 1.00                                 |
|                                 | Previous                                    | 0.67 (0.38-1.18)                   | 0.59 (0.33-1.05)                     |
|                                 | Current                                     | 1.64 (0.96-2.78)                   | 1.39 (0.81-2.38)                     |
| <b>Activity in Leisure Time</b> | Inactive                                    | 1.00                               | 1.00                                 |
|                                 | Active                                      | 0.47 (0.29-0.74)                   | 0.53 (0.33-0.85)                     |
| <b>Mean fruit intake</b>        | g/day                                       | 0.91 (0.76-1.07)                   | -                                    |
| <b>Employment</b>               | Yes                                         | 1.00                               | 1.00                                 |
|                                 | No                                          | 1.17 (0.70-1.96)                   | 1.04 (0.87-1.25)                     |
| <b>Marital Status</b>           | Single                                      | 2.77 (1.40-5.48)                   | 2.16 (2.06-4.40)                     |
|                                 | Married                                     | 1.00                               | 1.00                                 |
|                                 | Divorced                                    | 0.79 (0.41-1.51)                   | 0.76 (0.40-1.47)                     |
|                                 | Widowed                                     | 0.83 (0.30-2.30)                   | 1.15 (0.40-3.27)                     |
| <b>Myocardial infarction</b>    | -                                           | 1.00                               | -                                    |
|                                 | +                                           | 2.87 (1.04-7.89)                   | -                                    |
| <b>Stroke</b>                   | -                                           | 1.00                               | -                                    |
|                                 | +                                           | 1.58 (0.22-11.43)                  | -                                    |
| <b>Diabetes</b>                 | -                                           | 1.00                               | 1.00                                 |
|                                 | +                                           | 3.58 (1.44-8.90)                   | 2.42 (0.96-6.11)                     |
| <b>Hypertension</b>             | -                                           | 1.00                               | 1.00                                 |
|                                 | +                                           | 2.57 (1.61-4.09)                   | 2.47 (1.54-3.95)                     |

HR = Hazard Ratio. CI = Confidence interval.

STROBE Statement—Checklist of items that should be included in reports of *cohort studies*

|                              | Item No | Recommendation                                                                                                                                                                                                                                                                                                                                            |
|------------------------------|---------|-----------------------------------------------------------------------------------------------------------------------------------------------------------------------------------------------------------------------------------------------------------------------------------------------------------------------------------------------------------|
| <b>Title and abstract</b>    | 1       | (a) Indicate the study's design with a commonly used term in the title or the abstract – page 1<br>(b) Provide in the abstract an informative and balanced summary of what was done and what was found<br>- page 2                                                                                                                                        |
| <b>Introduction</b>          |         |                                                                                                                                                                                                                                                                                                                                                           |
| Background/rationale         | 2       | Explain the scientific background and rationale for the investigation being reported<br>-page 3-4                                                                                                                                                                                                                                                         |
| Objectives                   | 3       | State specific objectives, including any prespecified hypotheses<br>-page 4                                                                                                                                                                                                                                                                               |
| <b>Methods</b>               |         |                                                                                                                                                                                                                                                                                                                                                           |
| Study design                 | 4       | Present key elements of study design early in the paper<br>-page 4                                                                                                                                                                                                                                                                                        |
| Setting                      | 5       | Describe the setting, locations, and relevant dates, including periods of recruitment, exposure, follow-up, and data collection<br>-page 4-5                                                                                                                                                                                                              |
| Participants                 | 6       | (a) Give the eligibility criteria, and the sources and methods of selection of participants. Describe methods of follow-up<br>-page 4-5<br>(b) For matched studies, give matching criteria and number of exposed and unexposed<br>- N/A                                                                                                                   |
| Variables                    | 7       | Clearly define all outcomes, exposures, predictors, potential confounders, and effect modifiers. Give diagnostic criteria, if applicable<br>-page 4-6                                                                                                                                                                                                     |
| Data sources/<br>measurement | 8*      | For each variable of interest, give sources of data and details of methods of assessment (measurement). Describe comparability of assessment methods if there is more than one group<br>-page 4-6                                                                                                                                                         |
| Bias                         | 9       | Describe any efforts to address potential sources of bias                                                                                                                                                                                                                                                                                                 |
| Study size                   | 10      | Explain how the study size was arrived at<br>-page 4-5                                                                                                                                                                                                                                                                                                    |
| Quantitative variables       | 11      | Explain how quantitative variables were handled in the analyses. If applicable, describe which groupings were chosen and why<br>Page- 5-6                                                                                                                                                                                                                 |
| Statistical methods          | 12      | (a) Describe all statistical methods, including those used to control for confounding<br>-page 6<br>(b) Describe any methods used to examine subgroups and interactions<br>-N/A<br>(c) Explain how missing data were addressed<br>-N/A<br>(d) If applicable, explain how loss to follow-up was addressed<br>(e) Describe any sensitivity analyses<br>-N/A |



1  
2  
3  
4  
5  
6  
7  
8  
9  
10  
11  
12  
13  
14  
15  
16  
17  
18  
19  
20  
21  
22  
23  
24  
25  
26  
27  
28  
29  
30  
31  
32  
33  
34  
35  
36  
37  
38  
39  
40  
41  
42  
43  
44  
45  
46  
47  
48  
49  
50  
51  
52  
53  
54  
55  
56  
57  
58  
59  
60**Results**

|                          |     |                                                                                                                                                                                                                                                                                                                                                                                                                                               |
|--------------------------|-----|-----------------------------------------------------------------------------------------------------------------------------------------------------------------------------------------------------------------------------------------------------------------------------------------------------------------------------------------------------------------------------------------------------------------------------------------------|
| Participants             | 13* | (a) Report numbers of individuals at each stage of study—eg numbers potentially eligible, examined for eligibility, confirmed eligible, included in the study, completing follow-up, and analysed<br>Page -4 and 8<br><br>(b) Give reasons for non-participation at each stage<br>-due to space limitations non-participation for the DCH cohort is available in the referenced previous articles.<br><br>(c) Consider use of a flow diagram  |
| Descriptive data         | 14* | (a) Give characteristics of study participants (eg demographic, clinical, social) and information on exposures and potential confounders<br>-table 1<br><br>(b) Indicate number of participants with missing data for each variable of interest<br>-N/A<br><br>(c) Summarise follow-up time (eg, average and total amount)<br>-page 8                                                                                                         |
| Outcome data             | 15* | Report numbers of outcome events or summary measures over time                                                                                                                                                                                                                                                                                                                                                                                |
| Main results             | 16  | (a) Give unadjusted estimates and, if applicable, confounder-adjusted estimates and their precision (eg, 95% confidence interval). Make clear which confounders were adjusted for and why they were included<br>-table 2<br><br>(b) Report category boundaries when continuous variables were categorized<br>-table 2<br><br>(c) If relevant, consider translating estimates of relative risk into absolute risk for a meaningful time period |
| Other analyses           | 17  | Report other analyses done—eg analyses of subgroups and interactions, and sensitivity analyses<br>-N/A                                                                                                                                                                                                                                                                                                                                        |
| <b>Discussion</b>        |     |                                                                                                                                                                                                                                                                                                                                                                                                                                               |
| Key results              | 18  | Summarise key results with reference to study objectives<br>-page 8                                                                                                                                                                                                                                                                                                                                                                           |
| Limitations              | 19  | Discuss limitations of the study, taking into account sources of potential bias or imprecision. Discuss both direction and magnitude of any potential bias<br>Page 11-12                                                                                                                                                                                                                                                                      |
| Interpretation           | 20  | Give a cautious overall interpretation of results considering objectives, limitations, multiplicity of analyses, results from similar studies, and other relevant evidence<br>-page 8-11                                                                                                                                                                                                                                                      |
| Generalisability         | 21  | Discuss the generalisability (external validity) of the study results<br>-page 11                                                                                                                                                                                                                                                                                                                                                             |
| <b>Other information</b> |     |                                                                                                                                                                                                                                                                                                                                                                                                                                               |
| Funding                  | 22  | Give the source of funding and the role of the funders for the present study and, if applicable, for the original study on which the present article is based<br>-page 12                                                                                                                                                                                                                                                                     |

\*Give information separately for exposed and unexposed groups.



1 **Note:** An Explanation and Elaboration article discusses each checklist item and gives methodological background and  
2 published examples of transparent reporting. The STROBE checklist is best used in conjunction with this article (freely  
3 available on the Web sites of PLoS Medicine at <http://www.plosmedicine.org/>, Annals of Internal Medicine at  
4 <http://www.annals.org/>, and Epidemiology at <http://www.epidem.com/>). Information on the STROBE Initiative is  
5 available at <http://www.strobe-statement.org>.  
6  
7  
8  
9  
10  
11  
12  
13  
14  
15  
16  
17  
18  
19  
20  
21  
22  
23  
24  
25  
26  
27  
28  
29  
30  
31  
32  
33  
34  
35  
36  
37  
38  
39  
40  
41  
42  
43  
44  
45  
46  
47  
48  
49  
50  
51  
52  
53  
54  
55  
56  
57  
58  
59  
60

For peer review only

# BMJ Open

## Demographic, lifestyle, and comorbid risk factors for all-cause mortality in a Danish cohort of middle-aged adults with incident asthma

|                                 |                                                                                                                                                                                                                                                                  |
|---------------------------------|------------------------------------------------------------------------------------------------------------------------------------------------------------------------------------------------------------------------------------------------------------------|
| Journal:                        | <i>BMJ Open</i>                                                                                                                                                                                                                                                  |
| Manuscript ID                   | bmjopen-2021-049243.R3                                                                                                                                                                                                                                           |
| Article Type:                   | Original research                                                                                                                                                                                                                                                |
| Date Submitted by the Author:   | 01-Sep-2021                                                                                                                                                                                                                                                      |
| Complete List of Authors:       | Tupper, Oliver Djurhuus; Hvidovre Hospital, Department of Respiratory Medicine<br>Andersen, ZJ; University of Copenhagen Department of Public Health, Section of Environmental Health<br>Ulrik, Charlotte; Hvidovre Hospital, Department of Respiratory Medicine |
| <b>Primary Subject Heading</b>: | Epidemiology                                                                                                                                                                                                                                                     |
| Secondary Subject Heading:      | Respiratory medicine                                                                                                                                                                                                                                             |
| Keywords:                       | Asthma < THORACIC MEDICINE, Epidemiology < THORACIC MEDICINE, Adult thoracic medicine < THORACIC MEDICINE                                                                                                                                                        |
|                                 |                                                                                                                                                                                                                                                                  |

SCHOLARONE™  
Manuscripts



I, the Submitting Author has the right to grant and does grant on behalf of all authors of the Work (as defined in the below author licence), an exclusive licence and/or a non-exclusive licence for contributions from authors who are: i) UK Crown employees; ii) where BMJ has agreed a CC-BY licence shall apply, and/or iii) in accordance with the terms applicable for US Federal Government officers or employees acting as part of their official duties; on a worldwide, perpetual, irrevocable, royalty-free basis to BMJ Publishing Group Ltd ("BMJ") its licensees and where the relevant Journal is co-owned by BMJ to the co-owners of the Journal, to publish the Work in this journal and any other BMJ products and to exploit all rights, as set out in our [licence](#).

The Submitting Author accepts and understands that any supply made under these terms is made by BMJ to the Submitting Author unless you are acting as an employee on behalf of your employer or a postgraduate student of an affiliated institution which is paying any applicable article publishing charge ("APC") for Open Access articles. Where the Submitting Author wishes to make the Work available on an Open Access basis (and intends to pay the relevant APC), the terms of reuse of such Open Access shall be governed by a Creative Commons licence – details of these licences and which [Creative Commons](#) licence will apply to this Work are set out in our licence referred to above.

Other than as permitted in any relevant BMJ Author's Self Archiving Policies, I confirm this Work has not been accepted for publication elsewhere, is not being considered for publication elsewhere and does not duplicate material already published. I confirm all authors consent to publication of this Work and authorise the granting of this licence.

1  
2  
3 **Demographic, lifestyle, and comorbid risk factors for all-cause**  
4  
5  
6 **mortality in a Danish cohort of middle-aged adults with**  
7  
8  
9 **incident asthma**

10  
11  
12  
13 Oliver Djurhuus Tupper<sup>1</sup>, Zorana Jovanovic Andersen<sup>2</sup>, and Charlotte

14  
15  
16 Suppli Ulrik<sup>1,3</sup>

17  
18  
19 <sup>1</sup> Department of Respiratory Medicine, Copenhagen University Hospital Hvidovre,  
20  
21 Denmark

22  
23  
24 <sup>2</sup> Section of Environmental Health, Department of Public health, University of  
25  
26 Copenhagen, Denmark

27  
28  
29 <sup>3</sup> Institute of Clinical Medicine, University of Copenhagen, Copenhagen, Denmark

30  
31 **Corresponding Author**

32  
33 Oliver Djurhuus Tupper MD, PhD

34  
35 Respiratory Research Unit

36  
37 Department of Respiratory Medicine

38  
39 Hvidovre Hospital

40  
41 Kettegård Alle 30

42  
43 DK-2650 Hvidovre

44  
45 E-mail [olivertupper@gmail.com](mailto:olivertupper@gmail.com)

46  
47  
48 Word count abstract: 248

49  
50 Word count main text: 2600

## Abstract

### Objectives:

We aimed to identify factors associated with all-cause mortality in adults with incident asthma.

### Design and setting:

Cross-sectional cohort study, in the metropolitan areas of Copenhagen and Aarhus, Denmark.

### Participants:

Adults aged 50–64 years enrolled in the Danish Diet, Cancer, and Health cohort were followed from baseline (1993–1997) in the National Patients Registry for first-time admissions for asthma and vital status. We defined incident asthma as at least one first-time hospital admission with asthma as the primary registered diagnosis between baseline and end of follow-up (2013) in participants without previously known asthma. Among the cohort comprising 57 053 individuals, we identified 785 adults (aged 50–64) with incident asthma, of whom 76 died during follow-up.

### Primary and secondary outcome measures:

Baseline reported socioeconomic and lifestyle traits, and comorbidities associated with all-cause mortality.

### Results:

Self-reported leisure-time physical activity was associated with a substantial reduction in risk with an HR of 0.53 (95 % CI 0.33–0.85). Being male, single, and having a diagnosis of hypertension or diabetes were associated with an increased risk of all-cause mortality

1  
2  
3 with an HR of 1.83 (95 % CI 1.14–2.38), 2.16 (95 % CI 2.06–4.40), 2.47 (95 % CI 1.54–  
4  
5 3.95) and of 2.42 (95 % CI 0.96–6.11), respectively.  
6  
7

### 8 Conclusions:

9  
10 This long-term study of adults with hospital contacts for incident asthma revealed  
11  
12 that self-reported leisure-time physical activity is associated with an approximately  
13  
14 50% reduction in all-cause mortality. In contrast, both hypertension and diabetes  
15  
16 were associated with a higher risk of mortality.  
17  
18

### 19 **Strengths and limitations of this study:**

- 20  
21  
22  
23  
24  
25 • The present study is one of very few reporting on how physical activity and  
26  
27 comorbidities are associated with all-cause mortality in adults with asthma.  
28  
29 • Seven hundred eighty-five persons with incident asthma were followed up  
30  
31 for 20 years, with no loss to follow-up.  
32  
33 • The diagnosis of asthma is based on registry information and not a verified  
34  
35 objective assessment.  
36  
37 • There are only very few events among those with previous myocardial  
38  
39 infarction and stroke.  
40  
41  
42  
43  
44  
45

46 **Keywords:** Asthma, middle-aged adults, population cohort, comorbidities, long-term  
47

48 **Short Title:** Physical activity and asthma mortality  
49

## 50 **Introduction**

51  
52 With over 300 million persons worldwide suffering from asthma and many deaths each  
53  
54 year, asthma is a disease that continually requires attention.[1,2] Asthma remains a  
55  
56 disease that carries increased mortality compared with general populations.[3,4]  
57  
58  
59  
60

1  
2  
3 Asthma-specific mortality has, overall, been on a steady decline since the 1950s.[5–7]  
4  
5  
6 However, a study based on the WHO Mortality Database found that mortality trends  
7  
8 have plateaued, with no significant change in mortality between 2006 and 2012.[8]  
9  
10  
11 Furthermore, a British report from 2014 reported that over 67% of deaths related to  
12  
13 asthma were potentially preventable.[9]

14  
15 Asthma-specific mortality alone does not provide the whole picture when evaluating the  
16  
17 risks of the disease for individual patients. A study assessing deaths with asthma as a  
18  
19 contributing factor, in addition to asthma-specific causes, found that asthma as a  
20  
21 contributing factor was associated with more than twice as many deaths compared with  
22  
23 asthma-specific deaths alone.[10] Studies suggest that patients with asthma are more  
24  
25 prone to acquire other chronic conditions than the background population.[11–13] As  
26  
27 the impact of factors such as multimorbidity on all-cause mortality is an area with a  
28  
29 paucity of data, there is a need for further studies within this area.[14] The association  
30  
31 between physical activity and long-term mortality has been well established in the  
32  
33 general population and among patients with COPD.[15,16] However, this has not been  
34  
35 examined extensively in asthma.[17] The impact of physical activity on asthma-specific  
36  
37 factors, such as disease control, lung function, and exacerbations, has been well  
38  
39 researched.[17]

40  
41  
42 Based on the currently available knowledge, it remains of utmost importance to further  
43  
44 explore factors associated with asthma-related mortality, including not least all-cause  
45  
46 mortality.

47  
48  
49 The present study aimed to examine demographic, lifestyle and comorbid factors  
50  
51 associated with long-term all-cause mortality in adults with incident asthma from a large  
52  
53 Danish cohort.  
54  
55  
56  
57  
58  
59  
60

## Methods

Characteristics of the Diet, Cancer, and Health (DCH) cohort have been published previously, with a full description of the cohort.[18,19] A total of 160 725 individuals (72 729 women) were invited to participate in the DCH Cohort between 1993 and 1997. All individuals resided in either Copenhagen or Aarhus, which are the two largest cities in Denmark. To be invited, participants had to be 50–64 years of age and have no record of cancer at the time of inclusion. A total of 57 053 individuals (52.4% women, n=29 875) were enrolled in the study after accepting the invitation. The Central Danish Ethics Committee approved the main study of the DCH-cohort. The regional Danish Ethics Committee approved this sub-study (H-17025043) and the Danish Data Protection Agency (2014-41-3468). All participants provided written informed consent. Baseline factors were determined based on a comprehensive questionnaire completed by the participants. The questionnaire consisted of questions on general health and diet; demographic factors, including education and occupation; questions on lifestyle, including tobacco exposure; and pre-existing diseases, including asthma, COPD, diabetes, and cardiovascular disease.

### *Study cohort*

Participants in the DCH cohort were defined as having incident asthma and included in the present analyses as cases if they had the first-ever admission to a hospital, emergency department, or outpatient clinic with a primary diagnosis of asthma, which occurred between cohort baseline (1993–1997) and July 1<sup>st</sup>, 2013. Asthma was



1  
2  
3 classified according to the International Classification of Diseases (ICD) as ICD-10 codes  
4  
5 DJ45–46 and ICD-8 codes 493.00–493.09. Participants with a self-reported diagnosis of  
6  
7 asthma or COPD at baseline were excluded. Participants in the DCH cohort were linked  
8  
9 to the Danish National Patient Registry (DNPR) to extract hospital contacts from 1993—  
10  
11 1997 until July 1<sup>st</sup>, 2013.[20] The link between the DCH and DNPR was done using the  
12  
13 unique identifier all Danish residents have. Every discharge diagnosis from all Danish  
14  
15 hospitals since 1978 and outpatient clinics since 1995 is gathered in the DNPR.[21] In  
16  
17 addition to hospital contacts, we obtained emergency room visits and visits to  
18  
19 respiratory outpatient clinics. Cases were followed from first-ever asthma admission  
20  
21 until the time of death, emigration, or July 1<sup>st</sup>, 2013, whichever came first.  
22  
23  
24  
25  
26  
27  
28  
29

30 Physical activity in leisure time was determined based on a participant completed  
31  
32 questionnaire. An interviewer checked the questionnaire. Participants reported the  
33  
34 number of hours per week they did leisure time and transport-related (i.e., to and from  
35  
36 work, shopping) physical activity. Leisure-time physical activity was reported separately  
37  
38 for summer and winter of the previous year. It was allocated in the following categories:  
39  
40 cycling, “do-it-yourself” activities (i.e., home improvements), gardening, housework  
41  
42 (cleaning, laundry), sports, and walking. The two values for summer and winter were  
43  
44 averaged. The questions used have previously been validated in two studies by Peters  
45  
46 et al and Cust et al that found high correlations with movement sensing measurement  
47  
48 and accelerometer measurements, respectively.[22,23] Participants reported as being  
49  
50 physically active in leisure time, spent at least half an hour a week on at least one of the  
51  
52 six categories.  
53  
54  
55  
56  
57  
58  
59  
60

## Statistical Analyses

Associations between baseline factors and all-cause mortality were examined using the Cox proportional hazards model with age as the underlying time scale. We examined the following baseline factors identified at recruitment between 1993 and 1999: age, sex, BMI, length of education, employment and civil status, tobacco history, occupational exposure, leisure-time physical activity, fruit consumption, and comorbidities. Baseline factors were assessed in a two-step process: Step one, in a univariate model, with age as the underlying time scale. Step two was in a multivariate model that included only variables associated with all-cause mortality, defined by backward elimination. The proportional hazards assumption was evaluated by testing for a non-zero slope in a generalised linear regression of the scaled Schoenfeld residuals on functions of time. The univariate and multivariate model results are presented as hazard ratios (HRs) with 95% confidence intervals (CIs). Stata, version 11.2, was used to perform statistical analyses.

## *Patient and Public Involvement*

Patients and the public were not involved in the design of the study.

## **Results**

We identified 785 adults with an incident diagnosis of asthma and by that fulfilling the criteria for inclusion in the present analyses. No individuals were lost to follow-up, and therefore complete data were available for all 785 individuals. All characteristics included in the following analyses were obtained at baseline.

1  
2  
3 Between baseline and July 1<sup>st</sup>, 2013, 76 of the identified adults with incident asthma  
4  
5 died. The majority of cases with incident asthma were women 63% (n=495). Only 45%  
6  
7 (n=351) were never smokers at baseline. Interestingly, a substantial proportion of  
8  
9 ever-smokers were ex-smokers (60%, n=260) and not current smokers (40%, n=174).  
10  
11 The amount of tobacco exposure was much higher among those who died than those  
12  
13 with incident asthma still alive at the end of follow-up. Persons who died had an  
14  
15 average daily tobacco usage of 3.8 grams of tobacco, corresponding to 72% more than  
16  
17 those alive at the end of follow-up. Those who died had a daily intake of fruit that was  
18  
19 16 g (or 8.3 %) less than those still alive. Further characteristics are shown in Table 1.  
20  
21  
22  
23  
24  
25  
26  
27

28 Of the baseline characteristics included in the analyses, the following were found to be  
29  
30 associated with all-cause mortality and were therefore included in the final model: (1)  
31  
32 sex, (2) smoking status, (3) physical activity in leisure time, (5) employment status, (6)  
33  
34 marital status, (7) diabetes and (8) hypertension. On the other hand, age and a  
35  
36 previous diagnosis of myocardial infarction or stroke lacked power for precise  
37  
38 estimates for all-cause mortality in univariate analyses and were therefore not  
39  
40 included in the final model.  
41  
42  
43  
44

45 Male sex was associated with a higher risk for all-cause mortality (HR 1.83, 95% CI  
46  
47 1.14-2.93). Participants who reported being single had a higher mortality risk (HR of  
48  
49 2.16 95% CI 2.06-4.40) compared with those who reported being married. A diagnosis  
50  
51 of hypertension was associated with a substantially increased risk of all-cause  
52  
53 mortality (HR 2.47, 95% CI 1.54–3.95). Self-reported previous myocardial infarction  
54  
55 and a current diagnosis of diabetes had imprecise estimates associated with all-cause  
56  
57 mortality, although, notably, robust associations were detected. We found an HR of  
58  
59  
60

1  
2  
3 2.87 (95% CI 1.04-7.89) in the univariate model for myocardial infarction. An HR of 2.42  
4  
5 (95% CI 0.96-6.11) for diabetes was found in the multivariate model. We did not found  
6  
7 an association between previous stroke and all-cause mortality.  
8  
9

10 The self-reported leisure-time physical activity showed a substantial reduction in all-  
11  
12 cause mortality (HR 0.53, 95% CI 0.33–0.85). Mean daily fruit intake was not found to  
13  
14 be associated with death (table 2).  
15  
16

## 17 18 19 20 **Discussion**

21  
22  
23 In this Danish cohort of 785 adults with incident asthma followed for 20 years, we found  
24  
25 that physical activity was associated with a lower risk of all-cause mortality. In contrast,  
26  
27 being single or having hypertension were associated with increased all-cause mortality.  
28  
29

### 30 31 32 *Physical Activity*

33  
34 To the best of our knowledge, this is the first cohort study that has reported the  
35  
36 association between self-reported physical activity and all-cause mortality, specifically  
37  
38 in individuals with asthma. Physical activity has previously been shown to have a  
39  
40 positive effect on multiple aspects of asthma.[17] Particularly relevant are two studies  
41  
42 by Garcia-Aymerich et al[24] and Fisher et al[25] that found a protective effect of self-  
43  
44 reported physical activity on hospitalisation with asthma exacerbations. While the  
45  
46 same effect could not be found on readmissions for exacerbations in the study by  
47  
48 Fisher et al[25], their findings are essential to support our findings, as exacerbations  
49  
50 are associated with overall morbidity and mortality.[26] Physical activity also appears  
51  
52 to have a positive effect on asthma control.[27] However, BMI appears to be more  
53  
54 critical, negating the effects of physical activity in some, but not all, models.[17] It  
55  
56  
57  
58  
59  
60

1  
2  
3 appears that if persons with asthma have a moderate level of physical activity  
4  
5 compared with inactivity and strenuous physical activity, asthma control is positively  
6  
7 affected.[28] The positive effects on these other asthma outcomes could support our  
8  
9 finding that physical activity is associated with lower mortality risk.  
10  
11

12  
13 The effects of physical activity are prudent to establish as we know that patients with  
14  
15 asthma generally are less physically active than the general population.[29] Further,  
16  
17 we know from a Cochrane review from 2013 that physical activity is well-tolerated and  
18  
19 safe for individuals with asthma.[30] The review found that physical activity may  
20  
21 improve cardiopulmonary function in individuals with asthma without negatively  
22  
23 impacting pulmonary function. Furthermore, the Cochrane review is based on shorter-  
24  
25 term studies. Long-term findings from the Copenhagen City Heart study suggest that  
26  
27 physical activity may diminish long-term lung function decline in individuals with  
28  
29 asthma.[31] The amount of physical activity required to be defined as physically active  
30  
31 in our study is relatively low and, therefore, should be attainable by most. However,  
32  
33 future studies should explore whether there are additional benefits from moderate  
34  
35 and high levels of activity. Additionally, would a high or very high level of activity mean  
36  
37 the risks of adverse outcomes outweigh the benefits? A study by Russell et al.[32]  
38  
39 found that the benefits of physical activity on asthma symptoms were only present at  
40  
41 light levels of activity and not at intense activity levels. Based on our findings, there is  
42  
43 absolutely reason to motivate persons with asthma to do physical activity in their  
44  
45 leisure time.  
46  
47  
48  
49  
50  
51  
52  
53  
54  
55  
56

57 *Sex*  
58  
59  
60

1  
2  
3 We found that men had a higher hazard ratio for early death than women. Our  
4  
5 finding of higher all-cause mortality among men with asthma is well in line with  
6  
7 what is found by previous studies by Lemmetyinen et al[33] and Connolly et al.[34]  
8  
9  
10 However, because of the way the analyses are carried out, it is likely more a  
11  
12 reflection of a general higher mortality among men than specifically asthma-  
13  
14 related.  
15  
16

### 17 18 19 *Marital status*

20  
21  
22 Being single (never married) compared to married showed an independently  
23  
24 higher risk of death, while being divorced or widowed showed no change. This  
25  
26 effect has been shown repeatedly in previous studies.[35,36] The reasons behind  
27  
28 this effect is still much discussed, partly studies suggest that there is a selection of  
29  
30 less robust individuals to remain single or become divorced. Additionally, there  
31  
32 also seems to be a protective effect in being married.[37] A study by Dantzer et al  
33  
34 [38], found that there was no difference between single and married individuals  
35  
36 with asthma. However, they had not stratified single, as we have done, into three  
37  
38 different groups. Therefore, persons who were widowed or divorced were  
39  
40 included in the single group. As we found, being widowed or divorced is not  
41  
42 associated with all-cause mortality, which may explain the discrepancies in  
43  
44 findings.  
45  
46  
47  
48  
49  
50  
51

### 52 53 *Comorbidities*

54  
55 Hypertension had a strong association with death. Overall, all included comorbid  
56  
57 conditions at baseline appeared to be associated with a higher risk of death. However,  
58  
59  
60

1  
2  
3 only hypertension had a robust estimate, probably since the remaining comorbidities  
4  
5 (diabetes, stroke and myocardial infarction) had a relatively low prevalence at baseline.  
6  
7

8 There is limited research on how hypertension relates to mortality in a person with  
9  
10 asthma.[14] We found one other study by Sumino et al[39] from 2014 that report the  
11  
12 association between hypertension and mortality. They found a lower OR for mortality  
13  
14 among individuals with hypertension over the age of 65. However, the study by Sumino  
15  
16 et al[39] had a much shorter follow-up of three years compared with the 20 years of our  
17  
18 study. Given that hypertension is a condition that gives long-term complications, these  
19  
20 complications are likely not caught across such a short period.  
21  
22

23  
24 While the estimated hazard ratio for mortality among those with diabetes was imprecise  
25  
26 due to lack of power, it is worth mentioning that there appeared to be a strong  
27  
28 association between diabetes and a higher risk of all-cause mortality. While the amount  
29  
30 of other studies is exceedingly limited, there is other literature supporting this finding.  
31  
32 Sumino et al[39] found that diabetes was associated with a higher mortality rate in  
33  
34 persons over 65. Another cohort study by Koskela et al[40] showed that among 110  
35  
36 patients admitted due to an asthma exacerbation, there was a higher risk of mortality  
37  
38 for those with diabetes. While there is a clear trend in our data towards higher all-cause  
39  
40 mortality risk for individuals with previous myocardial infarction, the HR estimate was  
41  
42 imprecise once again due to only four events. Nevertheless, an excess risk of mortality  
43  
44 due to cardiovascular disease is an area that has substantial data supporting it in asthma  
45  
46 cohorts, and this certainly supports our finding.[41,42]  
47  
48  
49  
50  
51  
52  
53

54 The factors presented in this paper may seem obvious but needs to be verified in asthma  
55  
56 mainly, as many of these factors have not previously been explored in relation to adults  
57  
58 with asthma. Not least in large cohorts, as in the present long-term follow-up study of a  
59  
60

1  
2  
3 large cohort of middle-aged men and women with asthma. The relevance of this is due  
4  
5 to the systemic inflammation present in persons with asthma, which potentially could  
6  
7 affect and change which factors are essential to be aware of compared with general  
8  
9 populations.[43,44]  
10  
11  
12  
13

### 14 15 *Limitations*

16  
17 The diagnosis of asthma in the included subjects was based on ICD-10 codes connected  
18  
19 to hospital contacts, which is not as accurate as objectively verified asthma. However,  
20  
21 this has previously been established by Jensen et al[45] to be a robust method of  
22  
23 identifying persons with asthma. The positive predictive value was found to be 65%;  
24  
25 despite this, they discovered that associations found are still relevant. Selecting only  
26  
27 persons with either a hospital or outpatient contact means we may limit  
28  
29 generalisability, with the majority of persons included may have moderate or severe  
30  
31 disease. Nonetheless, a study from 2014 found that upwards of 25% of asthma  
32  
33 patients with mild to moderate disease experience poor asthma control and hospital  
34  
35 admissions.[46]  
36  
37  
38  
39  
40  
41

42 The prevalence of asthma in this cohort is low (about 1%), substantially lower than the  
43  
44 current reported prevalence in Denmark of 10%; therefore, the generalisability is  
45  
46 limited. The low prevalence is due to only including participants without a previous  
47  
48 diagnosis of asthma and only included individuals referred to secondary care.  
49  
50

51 Our definition of physical activity was based on self-reported information, which carries  
52  
53 a certain degree of bias. Additionally, a potential limitation is that the degree of self-  
54  
55 reported physical activity for some was reported multiple years before the first contact  
56  
57 for incident asthma. We can, therefore, not be sure that the level of physical activity still  
58  
59  
60



1  
2  
3 applies at follow-up. However, previous literature suggests that physical activity tracks  
4  
5 well over time, particularly in adulthood.[47,48]  
6  
7

8 We did not have information on the specific cause of death and could not examine  
9  
10 factors relating to asthma-specific mortality. Furthermore, we did not have data on  
11  
12 asthma severity, medication, pulmonary function and previous exacerbation, which  
13  
14 influences mortality risk.  
15  
16

17 As the number of events in this cohort study was not substantial, there is a risk of under  
18  
19 and overestimating the importance of the identified risk factors. Therefore, the results  
20  
21 of this study cannot stand on their own, yet it provides a valuable source for future  
22  
23 studies. This is particularly evident for diabetes, which shows a clear trend for a higher  
24  
25 risk of mortality, though it lacks the power for a precise estimate.  
26  
27  
28  
29  
30  
31

### 32 *Conclusions*

33  
34 Our study has shown that for middle-aged individuals with hospital contact for incident  
35  
36 asthma, persons with comorbidity or are single are at an increased risk of early all-cause  
37  
38 mortality. In contrast, leisure-time physical activity was found to have a protective effect  
39  
40 on mortality risk. Our findings, therefore, suggest that it is important to encourage our  
41  
42 asthma patients to do physical activity. Future studies should examine how varying  
43  
44 levels of physical activity affect mortality in persons with asthma, is there a diminishing  
45  
46 or negative effect at very high levels of activity?  
47  
48  
49  
50  
51  
52  
53

### 54 **Abbreviations:**

55  
56 BMI = Body Mass Index

57  
58 DCH = Diet Cancer and Health Cohort

59  
60 HR = Hazard Ratio

1  
2  
3 OR = Odds Ratio  
4  
5  
6

## 7 **Declarations**

10 **Ethics approval and consent to participate:** The study was approved by the ethical  
11 committee for the Capital Region of Denmark (H-17025043), the regional data safety  
12 committee for the capital region of Denmark (P-2019-712), and The Danish Data  
13 Protection Agency (2014-41-3468). All participants signed an informed consent form.  
14  
15

16  
17 **Funding:** This research did not receive any specific grant from funding agencies in  
18 the public, commercial, or not-for-profit sectors.  
19

20  
21 **Competing interests:** ODT, ZJA, and CSU have no perceived conflicts of interest in  
22 relation to this study.  
23

24  
25 **Authors' contributions:** Conception and design—ODT, ZJA and CSU.; preparation of  
26 data and statistical analyses - ZJA.; statistical interpretation and drafted the  
27 manuscript—ODT; all authors critically reviewed and accepted the final version of the  
28 manuscript.  
29

30  
31 **Availability of data and material:** The data are available upon reasonable request, but  
32 analysis may require approval from the regional data safety committee for the capital  
33 region of Denmark (Videnscenter for dataanmeldelser).  
34  
35

36  
37 **Acknowledgements:** Thanks to Anne Tjønneland and Kim Overvad for providing us  
38 with access to the data from the Diet, Cancer and Health cohort.  
39  
40  
41  
42  
43  
44  
45  
46  
47  
48  
49  
50  
51  
52  
53  
54  
55

## 56 **References**

- 57 1 WHO. Global surveillance, prevention and control of chronic respiratory  
58 diseases: a comprehensive approach.  
59 <http://www.who.int/gard/publications/GARD Book 2007.pdf?ua=1>  
60

- 1  
2  
3 2 Global strategy for asthma management and prevention. Glob. Initiasthma. 2020.<https://ginasthma.org> (accessed 16 Jun 2020).
- 4  
5  
6 3 Huovinen E, Kaprio J, Vesterinen E, *et al.* Mortality of adults with asthma: A  
7 prospective cohort study. *Thorax* 1997;**52**:49–54. doi:10.1136/thx.52.1.49
- 8  
9 4 D’Amato G, Vitale C, Molino A, *et al.* Asthma-related deaths. *Multidiscip Respir  
10 Med* 2016;**11**:1–5. doi:10.1186/s40248-016-0073-0
- 11  
12 5 Speizer FE, Doll R, Heaf P. Observations on Recent Increase in Mortality from  
13 Asthma. *Br Med J* 1968;**1**:335–9. doi:10.1136/bmj.1.5588.335
- 14  
15 6 Jackson RT, Beaglehole R, Rea HH, *et al.* Mortality from asthma: A new epidemic  
16 in New Zealand. *Br Med J* 1982;**285**:771–4. doi:10.1136/bmj.285.6344.771
- 17  
18 7 Sly RM. Mortality from asthma, 1979-1984. *J Allergy Clin Immunol* 1988;**82**:705–  
19 17. doi:10.1016/0091-6749(88)90069-3
- 20  
21 8 Ebmeier S, Thayabaran D, Braithwaite I, *et al.* Trends in international asthma  
22 mortality: analysis of data from the WHO Mortality Database from 46 countries  
23 (1993–2012). *Lancet* 2017;**390**:935–45. doi:10.1016/S0140-6736(17)31448-4
- 24  
25 9 Levy ML. The national review of asthma deaths: What did we learn and what  
26 needs to change? *Breathe* 2015;**11**:15–24. doi:10.1183/20734735.008914
- 27  
28 10 McCoy L, Redelings M, Sorvillo F, *et al.* A multiple cause-of-death analysis of  
29 asthma mortality in the United States, 1990-2001. *J Asthma* 2005;**42**:757–63.  
30 doi:10.1080/02770900500308189
- 31  
32 11 Soriano JB, Visick GT, Muellerova H, *et al.* Patterns of comorbidities in newly  
33 diagnosed COPD and asthma in primary care. *Chest* 2005;**128**:2099–107.  
34 doi:10.1378/chest.128.4.2099
- 35  
36 12 Gershon AS, Wang C, Guan J, *et al.* Burden of comorbidity in individuals with  
37 asthma. *Thorax* 2010;**65**:612–8. doi:10.1136/thx.2009.131078
- 38  
39 13 Adams RJ, Wilson DH, Taylor AW, *et al.* Coexistent chronic conditions and  
40 asthma quality of life: A population-based study. *Chest* 2006;**129**:285–91.  
41 doi:10.1378/chest.129.2.285
- 42  
43 14 Marques de Mello L, Cruz AA. A proposed scheme to cope with comorbidities in  
44 asthma. *Pulm Pharmacol Ther* 2018;**52**:41–51. doi:10.1016/j.pupt.2018.08.005
- 45  
46 15 Lear SA, Hu W, Rangarajan S, *et al.* The effect of physical activity on mortality  
47 and cardiovascular disease in 130 000 people from 17 high-income, middle-  
48 income, and low-income countries: the PURE study. *Lancet* 2017;**390**:2643–54.  
49 doi:10.1016/s0140-6736(17)31634-3
- 50  
51 16 Waschki B, Kirsten A, Holz O, *et al.* Physical activity is the strongest predictor of  
52 all-cause mortality in patients with COPD: a prospective cohort study. *Chest*  
53 2011;**140**:331–42. doi:10.1378/chest.10-2521
- 54  
55 17 Cordova-Rivera L, Gibson PG, Gardiner PA, *et al.* A Systematic Review of  
56 Associations of Physical Activity and Sedentary Time with Asthma Outcomes. *J  
57 Allergy Clin Immunol Pr* 2018;**6**:1968-1981 e2. doi:10.1016/j.jaip.2018.02.027
- 58  
59 18 Tjønneland A, Olsen A, Boll K, *et al.* Study design, exposure variables, and  
60 socioeconomic determinants of participation in Diet, Cancer and Health: a  
population-based prospective cohort study of 57,053 men and women in  
Denmark. *Scand J Public Health* 2007;**35**:432–41.  
doi:10.1080/14034940601047986
- 19 Bønnelykke K, Raaschou-Nielsen O, Tjønneland A, *et al.* Postmenopausal  
hormone therapy and asthma-related hospital admission. *J Allergy Clin Immunol*

- 2015;**135**:813-816.e5. doi:10.1016/j.jaci.2014.11.019
- 20 Pedersen CB. The Danish Civil Registration System. *Scand J Public Health* 2011;**39**:22–5. doi:10.1177/1403494810387965
- 21 Schmidt M, Schmidt SAJ, Sandegaard JL, *et al.* The Danish National Patient Registry: a review of content, data quality, and research potential. *Clin Epidemiol* 2015;**7**:449. doi:10.2147/CLEP.S91125
- 22 Cust AE, Smith BJ, Chau J, *et al.* Validity and repeatability of the EPIC physical activity questionnaire: A validation study using accelerometers as an objective measure. *Int J Behav Nutr Phys Act* 2008;**5**:33. doi:10.1186/1479-5868-5-33
- 23 Peters T, Brage S, Westgate K, *et al.* Validity of a short questionnaire to assess physical activity in 10 European countries. *Eur J Epidemiol* 2012;**27**:15–25. doi:10.1007/s10654-011-9625-y
- 24 Garcia-Aymerich J, Varraso R, Antó JM, *et al.* Prospective study of physical activity and risk of asthma exacerbations in older women. *Am J Respir Crit Care Med* 2009;**179**:999–1003. doi:10.1164/rccm.200812-1929OC
- 25 Fisher JE, Loft S, Ulrik CS, *et al.* Physical Activity, Air Pollution, and the Risk of Asthma and Chronic Obstructive Pulmonary Disease. *Am J Respir Crit Care Med* 2016;**194**:855–65. doi:10.1164/rccm.201510-2036OC
- 26 Chippes BE, Zeiger RS, Borish L, *et al.* Key findings and clinical implications from the Epidemiology and Natural History of Asthma: Outcomes and Treatment Regimens (TENOR) study. *J Allergy Clin Immunol* 2012;**130**:332-342.e10. doi:10.1016/j.jaci.2012.04.014
- 27 Panagiotou M, Koulouris NG, Rovina N. Physical Activity: A Missing Link in Asthma Care. *J Clin Med* 2020;**9**:706. doi:10.3390/jcm9030706
- 28 Del Giacco SR, Firinu D, Bjermer L, *et al.* Exercise and asthma: an overview. *Eur Clin Respir J* 2015;**2**:27984. doi:10.3402/ecrj.v2.27984
- 29 van 't Hul AJ, Frouws S, van den Akker E, *et al.* Decreased physical activity in adults with bronchial asthma. *Respir Med* 2016;**114**:72–7. doi:10.1016/j.rmed.2016.03.016
- 30 Kv C, Mg C, Picot J, *et al.* Physical training for asthma ( Review ) SUMMARY OF FINDINGS FOR THE MAIN COMPARISON. *Cochrane Libr* 2013;:1–73. doi:10.1002/14651858.CD001116.pub4.www.cochranelibrary.com
- 31 Garcia-Aymerich J, Lange P, Benet M, *et al.* Regular physical activity modifies smoking-related lung function decline and reduces risk of chronic obstructive pulmonary disease: A population-based cohort study. *Am J Respir Crit Care Med* 2007;**175**:458–63. doi:10.1164/rccm.200607-896OC
- 32 Russell MA, Janson C, Real FG, *et al.* Physical activity and asthma: A longitudinal and multi-country study. *J Asthma* 2017;**54**:938–45. doi:10.1080/02770903.2017.1281293
- 33 Lemmetyinen RE, Karjalainen J V., But A, *et al.* Higher mortality of adults with asthma: A 15-year follow-up of a population-based cohort. *Allergy Eur J Allergy Clin Immunol* 2018;**73**:1479–88. doi:10.1111/all.13431
- 34 Connolly CK, Alcock SM, Prescott RJ. Mortality in asthmatics over 15 yrs: A dynamic cohort study from 1983-1998. *Eur Respir J* 2002;**19**:593–8. doi:10.1183/09031936.02.00203002
- 35 Farr. The Influence of Marriage Upon the Rate of Mortality. *Lancet* 1879;**113**. doi:10.1016/s0140-6736(02)46313-1

- 1  
2  
3 36 Hu YR, Goldman N. Mortality differentials by marital status: an international  
4 comparison. *Demography* 1990;**27**:233–  
5 50. <https://www.ncbi.nlm.nih.gov/pubmed/2332088>  
6  
7 37 Robards J, Evandrou M, Falkingham J, *et al.* Marital status, health and mortality.  
8 *Maturitas* 2012;**73**:295–9. doi:10.1016/j.maturitas.2012.08.007  
9  
10 38 Dantzer C, Tessier JF, Nejjari C, *et al.* Mortality of elderly subjects with self-  
11 reported asthma in a French cohort, 1991-1996. *Eur J Epidemiol* 2001;**17**:57–63.  
12 doi:10.1023/A:1010996718008  
13  
14 39 Sumino K, O'Brian K, Bartle B, *et al.* Coexisting chronic conditions associated  
15 with mortality and morbidity in adult patients with asthma. *J Asthma*  
16 2014;**51**:306–14. doi:10.3109/02770903.2013.879881  
17  
18 40 Koskela HO, Salonen PH, Romppanen J, *et al.* A history of diabetes but not  
19 hyperglycaemia during exacerbation of obstructive lung disease has impact on  
20 long-term mortality: A prospective, observational cohort study. *BMJ Open*  
21 2015;**5**:6794. doi:10.1136/bmjopen-2014-006794  
22  
23 41 Xu M, Xu J, Yang X. Asthma and risk of cardiovascular disease or all-cause  
24 mortality: A meta-analysis. *Ann Saudi Med* 2017;**37**:99–105. doi:10.5144/0256-  
25 4947.2017.99  
26  
27 42 Strand LB, Tsai MK, Wen CP, *et al.* Is having asthma associated with an increased  
28 risk of dying from cardiovascular disease? A prospective cohort study of 446 346  
29 Taiwanese adults. *BMJ Open* 2018;**8**. doi:10.1136/bmjopen-2017-019992  
30  
31 43 Denburg JA, Sehmi R, Saito H, *et al.* Systemic aspects of allergic disease: Bone  
32 marrow responses. *J Allergy Clin Immunol* 2000;**106**:S242–6.  
33 doi:10.1067/mai.2000.110156  
34  
35 44 Bjermer L. Time for a paradigm shift in asthma treatment: From relieving  
36 bronchospasm to controlling systemic inflammation. *J Allergy Clin Immunol*  
37 2007;**120**:1269–75. doi:10.1016/j.jaci.2007.09.017  
38  
39 45 Jensen AO, Nielsen GL, Ehrenstein V. Validity of asthma diagnoses in the Danish  
40 National Registry of Patients, including an assessment of impact of  
41 misclassification on risk estimates in an actual dataset. *Clin Epidemiol*  
42 2010;**2**:67–72. <https://www.ncbi.nlm.nih.gov/pubmed/20865105>  
43  
44 46 von Bülow A, Kriegbaum M, Backer V, *et al.* The Prevalence of Severe Asthma  
45 and Low Asthma Control Among Danish Adults. *J Allergy Clin Immunol Pract*  
46 2014;**2**:759-767.e2. doi:10.1016/j.jaip.2014.05.005  
47  
48 47 Telama R. Tracking of physical activity from childhood to adulthood: A review.  
49 *Obes. Facts.* 2009;**2**:187–95. doi:10.1159/000222244  
50  
51 48 Mertens E, Clarys P, Mullie P, *et al.* Stability of physical activity, fitness  
52 components and diet quality indices. *Eur J Clin Nutr* 2017;**71**:519–24.  
53 doi:10.1038/ejcn.2016.172  
54  
55  
56  
57  
58  
59  
60

## Tables

**Table 1 – Baseline characteristics of 785 adults enrolled in the Danish Diet, Cancer and Health Cohort with incident asthma between baseline (1993-1997) and follow-up (July 2013).**

|                                               | Asthma<br>(N = 785) | Alive<br>(N= 709) | Dead<br>(N = 76) |
|-----------------------------------------------|---------------------|-------------------|------------------|
| Age 50-55, n (%)                              | 50 (6.4)            | 44 (6.2)          | 6 (7.9)          |
| Age 55-60, n (%)                              | 155 (19.7)          | 136 (19.2)        | 19 (25.0)        |
| Age 60-65, n (%)                              | 580 (73.9)          | 529 (74.6)        | 51 (67.1)        |
| Men, n (%)                                    | 290 (37)            | 136 (19)          | 19 (25)          |
| Mean body mass index (kg/m <sup>2</sup> )     | 26.5 (12)           | 26.4 (4.2)        | 27.1 (4.6)       |
| Smoking history, n (%)                        | Never               | 351 (45)          | 318 (45)         |
|                                               | Previous            | 260 (33)          | 241 (34)         |
|                                               | Current             | 174 (22)          | 150 (21)         |
| Mean smoking duration, years (SD)             | 25.9 (12)           | 25.3 (12)         | 31.1 (12)        |
| Mean smoking intensity, g/day (SD)            | 5.7 (9.1)           | 5.3 (9.0)         | 9.1 (10)         |
| Exposed to environmental tobacco smoke, n (%) | 449 (57)            | 403 (57)          | 46 (61)          |
| Physically active in leisure time, n (%)      | 432 (55)            | 404 (57)          | 28 (37)          |
| Mean fruit intake, g/day (SD)                 | 192 (145)           | 193 (146)         | 177 (129)        |
| Employed, n (%)                               | 612 (78)            | 559 (79)          | 53 (70)          |
| Marital status, n (%)                         | Single              | 45 (5.7)          | 35 (4.9)         |
|                                               | Married             | 558 (71)          | 507 (72)         |
|                                               | Divorced            | 136 (17)          | 125 (18)         |
|                                               | Widowed             | 46 (5.9)          | 42 (5.9)         |
| Years of Education                            | < 8                 | 223 (28)          | 198 (28)         |
|                                               |                     | 25 (33)           |                  |

|                   |                       |          |          |         |
|-------------------|-----------------------|----------|----------|---------|
| n (%)             | 8 – 10                | 395 (50) | 361 (51) | 34 (45) |
|                   | ≥ 10                  | 167 (21) | 150 (21) | 23 (30) |
| Comorbidity n (%) | Myocardial infarction | 13 (1.7) | 9 (1.3)  | 4 (5.3) |
|                   | Stroke                | 4 (0.5)  | 3 (0.4)  | 1 (1.3) |
|                   | Diabetes              | 13 (1.7) | 8 (1.1)  | 5 (6.6) |
|                   | Hypertension          | 155 (20) | 126 (18) | 29 (38) |
|                   | Hypercholesterolemia  | 46 (5.9) | 45 (6.3) | 1 (1.3) |

SD = standard deviation

For peer review only



**Table 2 - Determinants at baseline of survival in 785 adults with incident asthma during follow-up (2013) among participants in the Danish Diet, Cancer and Health Cohort.**

|                             |                                                | Univariate<br>model<br>HR (95% CI) | Multivariate<br>model<br>HR (95% CI) |
|-----------------------------|------------------------------------------------|------------------------------------|--------------------------------------|
| Age                         | 50-55                                          | 1.00                               | -                                    |
|                             | 55-60                                          | 0.84 (0.33-2.14)                   |                                      |
|                             | 60-65                                          | 0.76 (0.28-2.08)                   |                                      |
| Sex                         | Female                                         | 1.00                               | 1.00                                 |
|                             | Male                                           | 1.76 (1.12-2.75)                   | 1.83 (1.14-2.93)                     |
| Body Mass index             | Underweight/Normal (<25<br>kg/m <sup>2</sup> ) | 1.00                               | -                                    |
|                             | Overweight (25-30 kg/m <sup>2</sup> )          | 1.56 (0.93-2.63)                   | -                                    |
|                             | Obese (≥ 30 kg/m <sup>2</sup> )                | 1.52 (0.79-2.91)                   | -                                    |
| Smoking                     | Never                                          | 1.00                               | 1.00                                 |
|                             | Previous                                       | 0.67 (0.38-1.18)                   | 0.59 (0.33-1.05)                     |
|                             | Current                                        | 1.64 (0.96-2.78)                   | 1.39 (0.81-2.38)                     |
| Activity in Leisure<br>Time | Inactive                                       | 1.00                               | 1.00                                 |
|                             | Active                                         | 0.47 (0.29-0.74)                   | 0.53 (0.33-0.85)                     |
| Mean fruit intake           | g/day                                          | 0.91 (0.76-1.07)                   | -                                    |
| Employment                  | Yes                                            | 1.00                               | 1.00                                 |
|                             | No                                             | 1.17 (0.70-1.96)                   | 1.04 (0.87-1.25)                     |
| Marital Status              | Single                                         | 2.77 (1.40-5.48)                   | 2.16 (2.06-4.40)                     |
|                             | Married                                        | 1.00                               | 1.00                                 |
|                             | Divorced                                       | 0.79 (0.41-1.51)                   | 0.76 (0.40-1.47)                     |
|                             | Widowed                                        | 0.83 (0.30-2.30)                   | 1.15 (0.40-3.27)                     |
| Myocardial infarction       | -                                              | 1.00                               | -                                    |
|                             | +                                              | 2.87 (1.04-7.89)                   | -                                    |
| Stroke                      | -                                              | 1.00                               | -                                    |
|                             | +                                              | 1.58 (0.22-11.43)                  | -                                    |
| Diabetes                    | -                                              | 1.00                               | 1.00                                 |
|                             | +                                              | 3.58 (1.44-8.90)                   | 2.42 (0.96-6.11)                     |
| Hypertension                | -                                              | 1.00                               | 1.00                                 |
|                             | +                                              | 2.57 (1.61-4.09)                   | 2.47 (1.54-3.95)                     |

HR = Hazard Ratio. CI = Confidence interval.



STROBE Statement—Checklist of items that should be included in reports of *cohort studies*

|                              | Item No | Recommendation                                                                                                                                                                                                                                                                                                                                            |
|------------------------------|---------|-----------------------------------------------------------------------------------------------------------------------------------------------------------------------------------------------------------------------------------------------------------------------------------------------------------------------------------------------------------|
| <b>Title and abstract</b>    | 1       | (a) Indicate the study's design with a commonly used term in the title or the abstract – page 1<br>(b) Provide in the abstract an informative and balanced summary of what was done and what was found<br>- page 2                                                                                                                                        |
| <b>Introduction</b>          |         |                                                                                                                                                                                                                                                                                                                                                           |
| Background/rationale         | 2       | Explain the scientific background and rationale for the investigation being reported<br>-page 3-4                                                                                                                                                                                                                                                         |
| Objectives                   | 3       | State specific objectives, including any prespecified hypotheses<br>-page 4                                                                                                                                                                                                                                                                               |
| <b>Methods</b>               |         |                                                                                                                                                                                                                                                                                                                                                           |
| Study design                 | 4       | Present key elements of study design early in the paper<br>-page 4                                                                                                                                                                                                                                                                                        |
| Setting                      | 5       | Describe the setting, locations, and relevant dates, including periods of recruitment, exposure, follow-up, and data collection<br>-page 4-5                                                                                                                                                                                                              |
| Participants                 | 6       | (a) Give the eligibility criteria, and the sources and methods of selection of participants. Describe methods of follow-up<br>-page 4-5<br>(b) For matched studies, give matching criteria and number of exposed and unexposed<br>- N/A                                                                                                                   |
| Variables                    | 7       | Clearly define all outcomes, exposures, predictors, potential confounders, and effect modifiers. Give diagnostic criteria, if applicable<br>-page 4-6                                                                                                                                                                                                     |
| Data sources/<br>measurement | 8*      | For each variable of interest, give sources of data and details of methods of assessment (measurement). Describe comparability of assessment methods if there is more than one group<br>-page 4-6                                                                                                                                                         |
| Bias                         | 9       | Describe any efforts to address potential sources of bias                                                                                                                                                                                                                                                                                                 |
| Study size                   | 10      | Explain how the study size was arrived at<br>-page 4-5                                                                                                                                                                                                                                                                                                    |
| Quantitative variables       | 11      | Explain how quantitative variables were handled in the analyses. If applicable, describe which groupings were chosen and why<br>Page- 5-6                                                                                                                                                                                                                 |
| Statistical methods          | 12      | (a) Describe all statistical methods, including those used to control for confounding<br>-page 6<br>(b) Describe any methods used to examine subgroups and interactions<br>-N/A<br>(c) Explain how missing data were addressed<br>-N/A<br>(d) If applicable, explain how loss to follow-up was addressed<br>(e) Describe any sensitivity analyses<br>-N/A |

| <b>Results</b>           |     |                                                                                                                                                                                                                                                                                                                                                                                                                                                   |
|--------------------------|-----|---------------------------------------------------------------------------------------------------------------------------------------------------------------------------------------------------------------------------------------------------------------------------------------------------------------------------------------------------------------------------------------------------------------------------------------------------|
| Participants             | 13* | (a) Report numbers of individuals at each stage of study—eg numbers potentially eligible, examined for eligibility, confirmed eligible, included in the study, completing follow-up, and analysed<br>Page -4 and 8<br><hr/> (b) Give reasons for non-participation at each stage<br>-due to space limitations non-participation for the DCH cohort is available in the referenced previous articles.<br><hr/> (c) Consider use of a flow diagram  |
| Descriptive data         | 14* | (a) Give characteristics of study participants (eg demographic, clinical, social) and information on exposures and potential confounders<br>-table 1<br><hr/> (b) Indicate number of participants with missing data for each variable of interest<br>-N/A<br><hr/> (c) Summarise follow-up time (eg, average and total amount)<br>-page 8                                                                                                         |
| Outcome data             | 15* | Report numbers of outcome events or summary measures over time                                                                                                                                                                                                                                                                                                                                                                                    |
| Main results             | 16  | (a) Give unadjusted estimates and, if applicable, confounder-adjusted estimates and their precision (eg, 95% confidence interval). Make clear which confounders were adjusted for and why they were included<br>-table 2<br><hr/> (b) Report category boundaries when continuous variables were categorized<br>-table 2<br><hr/> (c) If relevant, consider translating estimates of relative risk into absolute risk for a meaningful time period |
| Other analyses           | 17  | Report other analyses done—eg analyses of subgroups and interactions, and sensitivity analyses<br>-N/A                                                                                                                                                                                                                                                                                                                                            |
| <b>Discussion</b>        |     |                                                                                                                                                                                                                                                                                                                                                                                                                                                   |
| Key results              | 18  | Summarise key results with reference to study objectives<br>-page 8                                                                                                                                                                                                                                                                                                                                                                               |
| Limitations              | 19  | Discuss limitations of the study, taking into account sources of potential bias or imprecision. Discuss both direction and magnitude of any potential bias<br>Page 11-12                                                                                                                                                                                                                                                                          |
| Interpretation           | 20  | Give a cautious overall interpretation of results considering objectives, limitations, multiplicity of analyses, results from similar studies, and other relevant evidence<br>-page 8-11                                                                                                                                                                                                                                                          |
| Generalisability         | 21  | Discuss the generalisability (external validity) of the study results<br>-page 11                                                                                                                                                                                                                                                                                                                                                                 |
| <b>Other information</b> |     |                                                                                                                                                                                                                                                                                                                                                                                                                                                   |
| Funding                  | 22  | Give the source of funding and the role of the funders for the present study and, if applicable, for the original study on which the present article is based<br>-page 12                                                                                                                                                                                                                                                                         |

\*Give information separately for exposed and unexposed groups.

1 **Note:** An Explanation and Elaboration article discusses each checklist item and gives methodological background and  
2 published examples of transparent reporting. The STROBE checklist is best used in conjunction with this article (freely  
3 available on the Web sites of PLoS Medicine at <http://www.plosmedicine.org/>, Annals of Internal Medicine at  
4 <http://www.annals.org/>, and Epidemiology at <http://www.epidem.com/>). Information on the STROBE Initiative is  
5 available at <http://www.strobe-statement.org>.  
6  
7  
8  
9  
10  
11  
12  
13  
14  
15  
16  
17  
18  
19  
20  
21  
22  
23  
24  
25  
26  
27  
28  
29  
30  
31  
32  
33  
34  
35  
36  
37  
38  
39  
40  
41  
42  
43  
44  
45  
46  
47  
48  
49  
50  
51  
52  
53  
54  
55  
56  
57  
58  
59  
60

For peer review only
